# Supplementary material for: Geographical Variation in Outcomes of Primary Hip and Knee Replacement
Source: PubMed Central journal article supplement (PMC6824227; doi:10.1001/jamanetworkopen.2019.14325), 2019-10-30
Supplement: jamanetwopen-2-e1914325-s001.pdf [file jamanetwopen-2-e1914325-s001.pdf]

## Supplementary Online Content

Garriga C, Leal J, Sánchez-Santos MT, et al. Geographical variation in outcomes of primary hip and knee replacement. *JAMA Netw Open*. 2019;2(10):e1914325.  
doi:10.1001/jamanetworkopen.2019.14325

### **eAppendix 1.** Cost Methods

**eAppendix 2.** Codes Defined in the *International Statistical Classification of Diseases and Related Health Problems, Tenth Revision (ICD-10)* Used to Identify Complications in the Hospital Episode Statistics (HES) Registry

**eAppendix 3.** Operative Procedure Codes (OPCS 4.8) Used to Identify Blood-Transfusion Complication in the Hospital Episode Statistics (HES) Registry

**eTable 1.** Potential Confounders of Outcome for Patients Who Underwent Planned Primary Hip or Knee Replacement From 2014 to 2016

**eTable 2.** Poisson Multilevel Models of Length of Stay for Patients Who Underwent Planned Primary Hip Replacement

**eTable 3.** Poisson Multilevel Models of Length of Stay for Patients Who Underwent Planned Primary TKR/UKR

**eTable 4.** Correlation Coefficients ( $\rho$ ) of Hospital Organizational Factors vs Predicted Outcomes of Surgery for Patients Undergoing Primary Joint Replacement, 2014-2016, England, United Kingdom

**eTable 5.** Poisson Multilevel Models of Bed-Day Costs for Patients Who Underwent Planned Primary Hip Replacement

**eTable 6.** Poisson Multilevel Models of Bed-Day Costs for Patients Who Underwent Planned Primary TKR/UKR

**eTable 7.** Continuous Multilevel Models of Oxford Hip Score for Patients Who Underwent Planned Primary Hip Replacement

**eTable 8.** Continuous Multilevel Models of Oxford Knee Score for Patients Who Underwent Planned Primary TKR/UKR

**eTable 9.** Logistic Multilevel Models of Complications at 6 Months for Patients Who Underwent Planned Primary Hip Replacement

**eTable 10.** Logistic Multilevel Models of Complications at 6 Months for Patients Who Underwent Planned Primary Hip TKR/UKR

**eTable 11.** Estimation of Patient Outcomes of Hip Replacement, TKR, and UKR, Adjusted for Patient, Surgical, and Hospital Organizational Factors

**eFigure 1.** Flow Diagram Showing Selection of Patients for Inclusion in This Study

**eFigure 2.** Caterpillar Plots of Patient Outcomes for Primary Knee Replacement by Health Area in England, 2014-2016

**eFigure 3.** Trends for 5 Worst and Best Health Areas (Clinical Commissioning Group Areas) for Primary Hip Replacement, England, 2014-2016

**eFigure 4.** Trends for 5 Worst and Best Health Areas (Clinical Commissioning Group Areas) for Primary TKR/UKR, England, 2014-2016

This supplementary material has been provided by the authors to give readers additional information about their work.

## **eAppendix 1. Cost Methods**

### Objective

We aimed to estimate the trend in National Health Service (NHS) expenditure over time, reflecting the change in length of stay (LOS) observed.

### Grouper and reference cost methods

Using Hospital Episode Statistics (HES) data for the same group of patients as for LOS, we generated healthcare resource use group (HRG) classifications for the index episode for each patient using the 2015/16 NHS reference costs grouper [1], which were subsequently used to estimate inpatient costs per patient using NHS reference costs from 2015/16 [2]. In order to estimate the mean change in NHS expenditure we estimated an adjusted average bed day cost.

### Estimating the adjusted average bed day cost

For each HRG we estimated the average cost per bed day (defined as any part of a day spent in hospital) by dividing the total cost of the index episodes for that HRG by the total number of bed days for that HRG. This generated a single average bed day cost per HRG.

For each patient we estimated the adjusted episode cost by multiplying their LOS (bed days) by the average bed day cost for the HRG that they had been assigned by the NHS reference costs grouper [1]. Therefore, instead of assigning the same unit cost to all patients with the same HRG who had a LOS below the trim point, the adjusted cost differed according to a patient's LOS, even if that LOS was below the trim point for the HRG. Using this method we were able to estimate the average difference in true NHS expenditure even when the LOS was below the trim point.

The 2015/16 grouper and reference costs [1,2] were used to estimate costs for all patients in all years, as there are differences in the methodologies used for HRG classification in

different cost years [3]. This prevents a like-for-like comparison between years if different groupers and/or costs are used.

Costs were estimated for a total of 173,106 patients undergoing hip replacement and 210,723 total and unicompartmental knee replacements.

#### References for Appendix 1

1. HRG4+ 2015/16 Reference Costs Grouper. Copyright © 2015 Health and Social Care Information Centre. Grouper version: RC 15/16. Implementation version: 1516.RC.8
2. Department of Health. NHS reference costs 2015 to 2016.  
<https://www.gov.uk/government/publications/nhs-reference-costs-2015-to-2016>
3. Reference Costs 2015-16. Department of Health.  
[https://assets.publishing.service.gov.uk/government/uploads/system/uploads/attachment\\_data/file/577083/Reference\\_Costs\\_2015-16.pdf](https://assets.publishing.service.gov.uk/government/uploads/system/uploads/attachment_data/file/577083/Reference_Costs_2015-16.pdf).

**eAppendix 2.** Codes Defined in the International Statistical Classification of Diseases and Related Health Problems, Tenth Revision (ICD-10) Used to Identify Complications in the Hospital Episode Statistics (HES) Registry

Stroke: I60.X, “Subarachnoid haemorrhage”; I61.0, “Intracerebral haemorrhage in hemisphere, subcortical”; I61.1, “Intracerebral haemorrhage in hemisphere, cortical”; I61.2, “Intracerebral haemorrhage in hemisphere, unspecified”; I61.3, “Intracerebral haemorrhage in brain stem”; I61.4, “Intracerebral haemorrhage in cerebellum”; I61.5, “Intracerebral haemorrhage, intraventricular”; I61.6, “Intracerebral haemorrhage, multiple localized”; I61.8, “Other intracerebral haemorrhage”; I61.9, “Intracerebral haemorrhage, unspecified”; I63.0, “Cerebral infarction due to thrombosis of precerebral arteries”; I63.1, “Cerebral infarction due to embolism of precerebral arteries”; I63.2, “Cerebral infarction due to unspecified occlusion or stenosis of precerebral arteries”; I63.3, “Cerebral infarction due to thrombosis of cerebral arteries”; I63.4, “Cerebral infarction due to embolism of cerebral arteries”; I63.5, “Cerebral infarction due to unspecified occlusion or stenosis of cerebral arteries”; I63.6, “Cerebral infarction due to cerebral venous thrombosis, nonpyogenic”; I63.8, “Other cerebral infarction”; I63.9, “Cerebral infarction, unspecified”; and I64.X, “Stroke, not specified as haemorrhage or infarction”.

Respiratory infection: J12.X, “Viral pneumonia, not elsewhere classified: bronchopneumonia due to viruses other than influenza viruses”; J13, “Pneumonia due to *Streptococcus pneumoniae*”; J14, “Pneumonia due to *Haemophilus influenzae*”; J15.X, “Bacterial pneumonia, not elsewhere classified: bronchopneumonia due to bacteria other than *S. pneumoniae* and *H. influenzae*”; J18.0, “Bronchopneumonia, unspecified. Excluding bronchiolitis”; J18.1, “Lobar pneumonia, unspecified”; J18.2, “Hypostatic pneumonia, unspecified”; J18.8, “Other pneumonia, organism unspecified”; J18.9, “Pneumonia, unspecified”; J22, “Unspecified acute lower respiratory infection”; J44.0, “Chronic

obstructive pulmonary disease with acute lower respiratory infection. Excluding with influenza”; J44.1, “Chronic obstructive pulmonary disease with acute exacerbation, unspecified”; J69.0, “Pneumonitis due to food and vomit. Excluding Mendelson syndrome”; J69.1, “Pneumonitis due to oils and essences”; J69.8, “Pneumonitis due to other solids and liquids. Pneumonitis due to aspiration of blood”; and J85.1, “Abscess of lung with pneumonia. Excluding with pneumonia due to specified organism”.

Acute myocardial infarction: I21.0, “Acute transmural myocardial infarction of anterior wall”; I21.1, “Acute transmural myocardial infarction of inferior wall”; I21.2, “Acute transmural myocardial infarction of other sites”; I21.3, “Acute transmural myocardial infarction of unspecified site”; I21.4, “Acute subendocardial myocardial infarction”; and I21.9, “Acute myocardial infarction, unspecified”.

Pulmonary embolism/deep vein thrombosis: I80.1, “Phlebitis and thrombophlebitis of superficial vessels of lower extremities”; I80.1, “Phlebitis and thrombophlebitis of femoral vein”; I80.3, “Phlebitis and thrombophlebitis of other deep vessels of lower extremities”; I26.0, “Pulmonary embolism with mention of acute cor pulmonale”; and I26.9, “Pulmonary embolism without mention of acute cor pulmonale”.

Urinary tract infection: N30.0, “Acute cystitis. Excluding irradiation cystitis and trigonitis”; and N39.0, “Urinary tract infection, site not specified”.

Wound disruption: T81.3, “Disruption of operation wound, not elsewhere classified”.

Surgical site infection: T81.4, “Infection following a procedure, not elsewhere classified”.

Fracture after implant: M96.6, “Fracture of bone following insertion of orthopaedic implant, joint prosthesis, or bone plate. Excluding complication of internal orthopaedic devices, implants or grafts”.

Complication of prosthesis: T84.0, “Mechanical complication of internal joint prosthesis”.

Neurovascular injury: T81.2, “Accidental puncture and laceration during a procedure, not elsewhere classified. Accidental perforation of: blood vessel, nerve or organ by: catheter, endoscope, instrument or probe during a procedure”.

Acute renal failure: N17.0, “Acute renal failure with tubular necrosis”; N17.1, “Acute renal failure with acute cortical necrosis”; N17.2, “Acute renal failure with medullary necrosis”; N17.8, “Other acute renal failure”; and N17.9, “Acute renal failure, unspecified”.

**eAppendix 3.** Operative Procedure Codes (OPCS 4.8) Used to Identify Blood-Transfusion Complication in the Hospital Episode Statistics (HES) Registry

X33.2, “Intravenous blood transfusion of packed cells”; X33.3, “Intravenous blood transfusion of platelets”; X33.8, “Other specified other blood transfusion”; X33.9, “Unspecified other blood transfusion”; X33.1, “Intra-arterial blood transfusion”; X33.7, “Autologous transfusion of red blood cells”; X34.1, “Transfusion of coagulation factor”; X34.2, “Transfusion of plasma not elsewhere classified”; X34.3, “Transfusion of serum not elsewhere classified”; and X34.4, “Transfusion of blood expander”.



**eTable 1.** Potential Confounders of Outcome for Patients Who Underwent Planned Primary Hip or Knee Replacement From 2014 to 2016

| Factors                                   | Additional information                                                                                                                                                                                                                                                                                                                                                        | Source |
|-------------------------------------------|-------------------------------------------------------------------------------------------------------------------------------------------------------------------------------------------------------------------------------------------------------------------------------------------------------------------------------------------------------------------------------|--------|
| <i>Patient factors</i>                    |                                                                                                                                                                                                                                                                                                                                                                               |        |
| Calendar year                             | 2014-2016                                                                                                                                                                                                                                                                                                                                                                     | NJR    |
| Age (years)                               | <50, 50-59, 60-69, 70-79, 80-84, ≥85                                                                                                                                                                                                                                                                                                                                          | NJR    |
| Sex                                       | Man; Woman                                                                                                                                                                                                                                                                                                                                                                    | NJR    |
| Body mass index (kg/m <sup>2</sup> )      | 16-60                                                                                                                                                                                                                                                                                                                                                                         | NJR    |
| Pre-operative ASA physical function score | Grade 1, fit and healthy; grade 2, mild disease; grade 3, incapacitating disease; grades 4 and 5, life-threatening disease or expected to die within 24 hours                                                                                                                                                                                                                 | NJR    |
| IMD (quintile groupings)                  | Grouped from “IMD Decile Group” variable using the IMD Overall Ranking to identify which one of five groups a Super Output Area belongs to (rank of 32482 is the least deprived, and 1 the most deprived). Least deprived 20%, 25987-32482; Less deprived 20-40%, 19490-25986; Less deprived 40-60%, 12994-19489; More deprived 20-40%, 6497-12993; Most deprived 20%, 1-6496 | HES    |
| Rural/Urban Indicator                     | Context from the original variable (sparse or less sparse) is ignored and variable is grouped into urban ≥=10,000 habitants; town and fringe; village/isolated                                                                                                                                                                                                                | HES    |
| Primary indication                        | Osteoarthritis; and osteoarthritis plus other indication.<br><u>Other indication for hip replacement:</u> Avascular Necrosis, Other Inflammatory Arthropathy, Acute Trauma Neck of Femur, Chronic Trauma, Previous                                                                                                                                                            | NJR    |

|                               |                                                                                                                                                                                                                                                                                                                                                                                                                                                                                                                                                                                                                                                                                                                                                                                                                                                                            |       |
|-------------------------------|----------------------------------------------------------------------------------------------------------------------------------------------------------------------------------------------------------------------------------------------------------------------------------------------------------------------------------------------------------------------------------------------------------------------------------------------------------------------------------------------------------------------------------------------------------------------------------------------------------------------------------------------------------------------------------------------------------------------------------------------------------------------------------------------------------------------------------------------------------------------------|-------|
|                               | <p>Surgery non-trauma Related, Ankylosing Spondylitis, Congenital Dislocation Dysplasia of Hip, Failed Hemi-Arthroplasty, Failed Internal Fixation, Fractured Acetabulum, Fractured Neck of Femur, Other Hip Trauma, Perthes, Previous Arthrodesis, Psoriatic Arthropathy, Seropositive Rheumatoid Arthritis, Seronegative Rheumatoid Arthritis, Slipped Upper Femoral Epiphysis (SUFE), Previous Infection, Trauma, Previous Hip Trauma not specified, Metastatic Cancer or Malignancy, Skeletal Dysplasia, or Other.</p> <p><u>Other indication for knee replacement:</u> Avascular Necrosis, Other Inflammatory Arthropathy, Previous Trauma, Failed Internal Fixation, Previous Arthrodesis, Seropositive Rheumatoid Arthritis, Seronegative Rheumatoid Arthritis, Rheumatoid Arthritis, Previous Infection, Trauma, Previous knee Trauma not specified, or Other.</p> |       |
| Charlson score                | Grouped into 4 groups (none=0, mild=1, moderate=2, severe $\geq$ 3)                                                                                                                                                                                                                                                                                                                                                                                                                                                                                                                                                                                                                                                                                                                                                                                                        | HES   |
| Baseline OHS/baseline OKS     | 0 the worst possible and 48 the best possible score                                                                                                                                                                                                                                                                                                                                                                                                                                                                                                                                                                                                                                                                                                                                                                                                                        | PROMs |
| EQ-5D-3L (quintile groupings) | -0.594 the worst possible and 1 the best possible score grouped in quintiles (hips: -0.594 to -0.016; -0.017 to 0.100; 0.101 to 0.586; 0.587 to 0.690; 0.691 to 1; knees: -0.594 to 0.054; 0.055 to 0.158; 0.159 to 0.610; 0.620 to 0.690; 0.691 to 1)                                                                                                                                                                                                                                                                                                                                                                                                                                                                                                                                                                                                                     | PROMs |
| <i>Surgical factors</i>       |                                                                                                                                                                                                                                                                                                                                                                                                                                                                                                                                                                                                                                                                                                                                                                                                                                                                            |       |
| Lead surgeon experience       | Consultant with $\geq$ 8 training years, and surgeons with <8 (including Associate Specialist [4 training years], Foundation doctor (FY1 and FY2) [2 training years],                                                                                                                                                                                                                                                                                                                                                                                                                                                                                                                                                                                                                                                                                                      | NJR   |

|                                                                 |                                                                                                                                                                                                                                                                                                                                                                                                                                                              |     |
|-----------------------------------------------------------------|--------------------------------------------------------------------------------------------------------------------------------------------------------------------------------------------------------------------------------------------------------------------------------------------------------------------------------------------------------------------------------------------------------------------------------------------------------------|-----|
|                                                                 | Specialty trainees years 1 and 2 (ST1 and ST2) [4 training years], Fellow, House Officer, Senior House Officer [minimum 2 years; often more], Specialist Registrar (SPR) [minimum 6 years], specialty general surgical training (ST3-8) [minimum 6 years], Specialty Doctor/Specialty and associate specialist (SAS) doctors [non-training roles where the doctor has at least four years of postgraduate training], Staff grade/ Clinical Assistant, Other) |     |
| Surgical volume per lead surgeon (number of surgeries per year) | Grouped into 6 categories ( $\leq 10$ ; 11-50; 51-75; 76-100; 101-150; $>150$ )                                                                                                                                                                                                                                                                                                                                                                              | NJR |
| Surgical volume per unit (number of surgeries per year)         | Grouped into 5 categories ( $<200$ ; 200-299; 300-399; 400-499; $\geq 500$ )                                                                                                                                                                                                                                                                                                                                                                                 | NJR |
| Minimally invasive surgery                                      | Yes; No                                                                                                                                                                                                                                                                                                                                                                                                                                                      | NJR |
| Thromboprophylaxis                                              | Grouped into 4 categories: None; Aspirin only; LMWH (with/without pentasaccharide, warfarin, direct thrombin inhibitor, direct factor Xa inhibitor, other); Other except LMWH)                                                                                                                                                                                                                                                                               | NJR |
| Mechanical prophylaxis                                          | Grouped into 2 categories: None; Any (venous foot pump, elastic compression stockings, intermittent calf compression)                                                                                                                                                                                                                                                                                                                                        | NJR |
| Anaesthetic type                                                | General, regional - epidural, regional - nerve block, and regional - spinal (intrathecal)                                                                                                                                                                                                                                                                                                                                                                    | NJR |
| Type of approach                                                | <u>In hip replacement</u> : posterior, other [anterior, antero-lateral, hardinge, lateral, trochanteric osteotomy, other]<br><u>In knee replacement</u> : lateral parapatellar, medial parapatellar, mid-vastus, sub-vastus, other                                                                                                                                                                                                                           | NJR |
| Hip bone graft                                                  |                                                                                                                                                                                                                                                                                                                                                                                                                                                              |     |

|                                                            |                                                                                           |      |
|------------------------------------------------------------|-------------------------------------------------------------------------------------------|------|
| Femoral bone graft                                         | None; Any                                                                                 | NJR  |
| Cup bone graft                                             | None; Any                                                                                 | NJR  |
| Knee bone graft                                            |                                                                                           |      |
| Femoral bone graft                                         | None; Any                                                                                 | NJR  |
| Tibial bone graft                                          | None; Any                                                                                 | NJR  |
| Hip implant fixation                                       |                                                                                           |      |
| Cup fixation                                               | Cementless; Cemented                                                                      | NJR  |
| Stem fixation except THR                                   | Cementless hip replacement stem; Cemented hip replacement stem; THR or missing            | NJR  |
| Stem fixation except resurfacing                           | Cementless THR stem; Cemented THR stem; resurfacing or missing                            | NJR  |
| Knee implant fixation                                      |                                                                                           |      |
| Femoral fixation                                           | Cementless; Cemented                                                                      | NJR  |
| Tibial fixation                                            | Cementless; Cemented                                                                      | NJR  |
| Type of hip implant                                        |                                                                                           |      |
| Bearing surface                                            | Grouped into 5 categories: MoM; MoP; CoC; CoP; and CoM or MoC or missing                  | NJR  |
| Femoral head size (mm)                                     | Grouped into 4 categories: $\leq 28$ , 32, 36-42, and $\geq 44$                           | NJR  |
| Type of knee implant                                       | Grouped into 2 categories: Total knee replacement; and Unicompartmental knee replacement. | NJR  |
| <i>Hospital organisation factors</i>                       |                                                                                           |      |
| Unit type                                                  | Public hospital; Private hospital; and Independent sector (private) - treatment centre    | NJR  |
| FTE of speciality groups on trauma and orthopaedic surgery | 0-24; 25-29; 30-39; 40-49; >50                                                            | HCHS |
| consultants FTE                                            | 0-24; 25-29; 30-39; 40-49; >50                                                            | HCHS |
| middle grade doctor FTE                                    | 0-24; 25-29; 30-39; 40-49; >50                                                            | HCHS |
| early career doctor FTE                                    | 0-24; 25-29; 30-39; 40-49; >50                                                            | HCHS |

|                                                                   |                                               |                          |
|-------------------------------------------------------------------|-----------------------------------------------|--------------------------|
| Total beds available overnight                                    | 0-349; 350-499; 500-699; 700-999; $\geq 1000$ | KH03 –<br>NHS<br>England |
| Total beds available overnight for trauma and orthopaedic surgery | 0-34; 35-49; 50-69; 70-99; $\geq 100$         | KH03 –<br>NHS<br>England |
| Total beds available overnight for rehabilitation                 | 0; >0-10; 11-20; $\geq 20$                    | KH03 –<br>NHS<br>England |
| Operating theatres                                                | <10; 10-14; 15-19; 20-24; $\geq 25$           | NHS<br>England           |
| Dedicated day case operating theatres                             | 0; 1-2; 3-4; 5-6; $\geq 7$                    | NHS<br>England           |

UK National Joint Registry, NJR; American Society of Anesthesiologists, ASA; Index of multiple deprivation, IMD; hospital episode statistics, HES; Oxford hip score, OHS; Oxford knee score, OKS; Patient Reported Outcome Measures, PROMs; European Quality of life-five domain, EQ-5D-3L; low-molecular-weight heparin, LMWH; total hip replacement, THR; metal-on-metal, MoM; metal-on-polyethylene, MoP; ceramic-on-ceramic, CoC; ceramic-on-polyethylene, CoP; ceramic-on-metal, CoM; metal-on-ceramic, MoC; full time equivalent, FTE (proportion of full time contracted hours); NHS Hospital & Community Health Service, HCHS (monthly workforce statistics); quarterly collection from all NHS organisations that operate beds, KH03 – NHS England.

**eTable 2.** Poisson Multilevel Models of Length of Stay for Patients Who Underwent Planned Primary Hip Replac

|                                                                                      |                           | Patient model |                 |       | Surgical model |                 |       | Hospital |  |
|--------------------------------------------------------------------------------------|---------------------------|---------------|-----------------|-------|----------------|-----------------|-------|----------|--|
|                                                                                      | Categories                | Coef.         | 95% CI          | P     | Coef.          | 95% CI          | P     | Coef.    |  |
| <i>Intercept</i>                                                                     |                           | 1.16          | [1.13-1.20]     | <0.01 | 1.17           | [1.14-1.21]     | <0.01 | 1.13     |  |
| <i>Patient factors</i>                                                               |                           |               |                 |       |                |                 |       |          |  |
| Calendar year (2016)                                                                 | 2015                      | 0.09          | [0.08-0.09]     | <0.01 | 0.08           | [0.07-0.08]     | <0.01 | 0.07     |  |
|                                                                                      | 2016                      | 0.05          | [0.04-0.05]     | <0.01 | 0.04           | [0.03-0.04]     | <0.01 | 0.03     |  |
| Age (<50 years)                                                                      | 50-59                     | 0.01          | [<0.01-0.03]    | 0.12  | 0.01           | [-0.01-0.02]    | 0.29  | 0.02     |  |
|                                                                                      | 60-69                     | 0.06          | [0.05-0.07]     | <0.01 | 0.05           | [0.03-0.06]     | <0.01 | 0.07     |  |
|                                                                                      | 70-79                     | 0.20          | [0.19-0.22]     | <0.01 | 0.17           | [0.16-0.19]     | <0.01 | 0.19     |  |
|                                                                                      | 80-84                     | 0.42          | [0.41-0.44]     | <0.01 | 0.38           | [0.37-0.40]     | <0.01 | 0.39     |  |
|                                                                                      | ≥85                       | 0.63          | [0.61-0.64]     | <0.01 | 0.59           | [0.57-0.60]     | <0.01 | 0.59     |  |
| Sex (woman)                                                                          | man                       | -0.09         | [-0.09-(-0.08)] | <0.01 | -0.09          | [-0.09-(-0.08)] | <0.01 | -0.09    |  |
| BMI, (kg/m <sup>2</sup> )                                                            |                           | <0.01         | [<0.01-<0.01]   | <0.01 | <0.01          | [<0.01-<0.01]   | <0.01 | <0.01    |  |
| Pre-operative ASA physical function score (Mild disease not incapacitating, grade 2) | Fit and healthy (grade 1) | -0.06         | [-0.07-(-0.05)] | <0.01 | -0.05          | [-0.06-(-0.05)] | <0.01 | -0.05    |  |

|                                                  |                                                                         |       |                 |       |       |                 |       |       |                 |       |
|--------------------------------------------------|-------------------------------------------------------------------------|-------|-----------------|-------|-------|-----------------|-------|-------|-----------------|-------|
|                                                  | Incapacitating systemic disease (grade 3)                               | 0.22  | [0.21-0.22]     | <0.01 | 0.20  | [0.20-0.21]     | <0.01 | 0.17  | [0.17-0.18]     | <0.01 |
|                                                  | Life threatening disease or Expected to die within 24h (grades 4 and 5) | 0.43  | [0.40-0.46]     | <0.01 | 0.41  | [0.38-0.44]     | <0.01 | 0.36  | [0.33-0.39]     | <0.01 |
| IMD (Most deprived 20%)                          | Least deprived 20%                                                      | -0.04 | [-0.05-(-0.03)] | <0.01 | -0.03 | [-0.05-(-0.02)] | <0.01 | -0.02 | [-0.04-(-0.01)] | <0.01 |
|                                                  | Less deprived 20-40%                                                    | -0.03 | [-0.04-(-0.02)] | <0.01 | -0.03 | [-0.04-(-0.01)] | <0.01 | -0.02 | [-0.03-(-0.01)] | <0.01 |
|                                                  | Less deprived 40-60%                                                    | -0.02 | [-0.03-(-0.01)] | <0.01 | -0.02 | [-0.03-(-0.01)] | <0.01 | -0.02 | [-0.03-(-0.01)] | <0.01 |
|                                                  | More deprived 20-40%                                                    | -0.01 | [-0.02-<0.01]   | 0.07  | -0.01 | [-0.02-<0.01]   | 0.06  | -0.01 | [-0.02-<0.01]   | 0.11  |
| Rural/Urban indicator (Urban >=10,000 habitants) | Town and fringe                                                         | -0.01 | [-0.02-<0.01]   | 0.08  | -0.01 | [-0.02-<0.01]   | 0.14  | <0.01 | [-0.02-0.01]    | 0.44  |

|                                                                  |                              |       |                 |       |       |                 |       |       |                 |       |
|------------------------------------------------------------------|------------------------------|-------|-----------------|-------|-------|-----------------|-------|-------|-----------------|-------|
|                                                                  | Village/isolated             | -0.02 | [-0.03-(-0.01)] | <0.01 | -0.02 | [-0.03-(-0.01)] | <0.01 | -0.01 | [-0.02-<0.01]   | 0.04  |
| Primary indication<br>(Osteoarthritis)                           | Osteoarthritis<br>and Other* | 0.18  | [0.17-0.20]     | <0.01 | 0.17  | [0.16-0.19]     | <0.01 | 0.14  | [0.13-0.15]     | <0.01 |
| Charlson score (None,<br>0)                                      | Mild (1)                     | 0.08  | [0.07-0.08]     | <0.01 | 0.08  | [0.07-0.08]     | <0.01 | 0.07  | [0.06-0.07]     | <0.01 |
|                                                                  | Moderate (2)                 | 0.19  | [0.18-0.19]     | <0.01 | 0.18  | [0.17-0.19]     | <0.01 | 0.16  | [0.15-0.17]     | <0.01 |
|                                                                  | Severe ( $\geq 3$ )          | 0.34  | [0.33-0.35]     | <0.01 | 0.33  | [0.32-0.34]     | <0.01 | 0.30  | [0.29-0.32]     | <0.01 |
| EQ-5D-3L (Highest<br>quintile)                                   | Lowest quintile              | -0.13 | [-0.14-(-0.12)] | <0.01 | -0.13 | [-0.14-(-0.12)] | <0.01 | -0.12 | [-0.13-(-0.12)] | <0.01 |
|                                                                  | 2nd quintile                 | -0.17 | [-0.18-(-0.16)] | <0.01 | -0.16 | [-0.17-(-0.16)] | <0.01 | -0.16 | [-0.17-(-0.15)] | <0.01 |
|                                                                  | 3rd quintile                 | -0.20 | [-0.21-(-0.19)] | <0.01 | -0.19 | [-0.20-(-0.18)] | <0.01 | -0.18 | [-0.19-(-0.17)] | <0.01 |
|                                                                  | 4th quintile                 | -0.24 | [-0.25-(-0.23)] | <0.01 | -0.23 | [-0.24-(-0.22)] | <0.01 | -0.22 | [-0.23-(-0.21)] | <0.01 |
| <i>Surgical factors</i>                                          |                              |       |                 |       |       |                 |       |       |                 |       |
| Lead surgeon<br>experience<br>(Consultant)                       | Other**                      |       |                 |       | 0.09  | [0.08-0.10]     | <0.01 | 0.02  | [0.01-0.03]     | <0.01 |
| Surgical volume per<br>lead surgeon (>150<br>surgeries per year) | $\leq 10$                    |       |                 |       | 0.11  | [0.09-0.13]     | <0.01 | 0.04  | [0.03-0.06]     | <0.01 |



|                                                            |                 |  |  |  |       |                 |       |       |                 |       |
|------------------------------------------------------------|-----------------|--|--|--|-------|-----------------|-------|-------|-----------------|-------|
|                                                            | 11-50           |  |  |  | 0.08  | [0.07-0.09]     | <0.01 | 0.02  | [0.02-0.03]     | <0.01 |
|                                                            | 51-75           |  |  |  | 0.05  | [0.04-0.06]     | <0.01 | 0.01  | [<0.01-0.02]    | 0.01  |
|                                                            | 76-100          |  |  |  | 0.03  | [0.02-0.04]     | <0.01 | <0.01 | [-0.01-0.01]    | 0.96  |
|                                                            | 101-150         |  |  |  | 0.03  | [0.02-0.04]     | <0.01 | 0.01  | [<0.01-0.02]    | 0.08  |
| Surgical volume per unit (Surgeries per year, $\geq 500$ ) | $\leq 200$      |  |  |  | 0.05  | [0.04-0.06]     | <0.01 | 0.14  | [0.13-0.15]     | <0.01 |
|                                                            | 200-299         |  |  |  | <0.01 | [-0.01-0.01]    | 0.56  | 0.06  | [0.05-0.07]     | <0.01 |
|                                                            | 300-399         |  |  |  | -0.04 | [-0.06-(-0.03)] | <0.01 | 0.01  | [<0.01-0.03]    | 0.02  |
|                                                            | 400-499         |  |  |  | -0.04 | [-0.06-(-0.03)] | <0.01 | 0.05  | [0.04-0.07]     | <0.01 |
| Minimally invasive surgery (No)                            | Yes             |  |  |  | -0.05 | [-0.07-(-0.04)] | <0.01 | -0.03 | [-0.05-(-0.02)] | <0.01 |
| Thromboprophylaxis (LMWH +/-Other)                         | None            |  |  |  | <0.01 | [-0.02-0.03]    | 0.91  | 0.03  | [<0.01-0.05]    | 0.04  |
|                                                            | Aspirin only    |  |  |  | -0.03 | [-0.05-(-0.02)] | <0.01 | -0.02 | [-0.04-(-0.01)] | 0.01  |
|                                                            | Other (no LMWH) |  |  |  | -0.02 | [-0.03-(-0.02)] | <0.01 | <0.01 | [<0.01-0.01]    | 0.42  |
| Mechanical prophylaxis (any)                               | None            |  |  |  | 0.08  | [0.06-0.09]     | <0.01 | 0.03  | [0.01-0.04]     | <0.01 |

|                                            |                                                                                              |  |  |  |       |                 |       |       |                 |       |
|--------------------------------------------|----------------------------------------------------------------------------------------------|--|--|--|-------|-----------------|-------|-------|-----------------|-------|
| General anaesthesia<br>(No)                | Yes                                                                                          |  |  |  | 0.04  | [0.03-0.05]     | <0.01 | 0.04  | [0.03-0.04]     | <0.01 |
| Regional – epidural<br>anaesthesia (No)    | Yes                                                                                          |  |  |  |       |                 |       |       |                 |       |
| Regional – nerve block<br>anaesthesia (No) | Yes                                                                                          |  |  |  | 0.05  | [0.04-0.06]     | <0.01 | 0.04  | [0.03-0.05]     | <0.01 |
| Regional – spinal<br>anaesthesia (No)      | Yes                                                                                          |  |  |  | -0.03 | [-0.04-(-0.03)] | <0.01 | -0.03 | [-0.04-(-0.02)] | <0.01 |
| Type of approach<br>(Posterior)            | Anterior,<br>antero-lateral,<br>hardinge,<br>lateral,<br>trochanteric<br>osteotomy,<br>other |  |  |  | 0.06  | [0.05-0.07]     | <0.01 | 0.06  | [0.06-0.07]     | <0.01 |
| Femoral bone graft<br>(No)                 | Yes                                                                                          |  |  |  | 0.06  | [0.03-0.10]     | <0.01 | 0.06  | [0.03-0.10]     | <0.01 |
| Cup bone graft (No)                        | Yes                                                                                          |  |  |  | 0.07  | [0.06-0.08]     | 0.68  | 0.05  | [0.04-0.07]     | <0.01 |

|                                                         |                                 |  |  |  |       |                 |       |       |                 |       |
|---------------------------------------------------------|---------------------------------|--|--|--|-------|-----------------|-------|-------|-----------------|-------|
| Primary cup fixation<br>(Cementless)                    | Cemented                        |  |  |  | -0.01 | [-0.02-(-0.01)] | <0.01 | -0.01 | [-0.02-<0.01]   | <0.01 |
| Type of primary stem<br>fixation (Cemented<br>THR stem) | Not available or<br>Resurfacing |  |  |  | 0.01  | [-0.03-0.04]    | 0.89  | 0.03  | [-0.01-0.06]    | 0.13  |
|                                                         | Cementless<br>THR stem          |  |  |  | -0.07 | [-0.08-(-0.07)] | 1.00  | -0.04 | [-0.05-(-0.04)] | <0.01 |
| Bearing surface (MoP)                                   | MoM                             |  |  |  | -0.01 | [-0.10-0.09]    | 0.89  | -0.07 | [-0.17-0.02]    | 0.14  |
|                                                         | CoC                             |  |  |  | <0.01 | [-0.01-0.01]    | 1.00  | -0.03 | [-0.04-(-0.02)] | <0.01 |
|                                                         | CoP                             |  |  |  | -0.02 | [-0.03-(-0.02)] | <0.01 | -0.04 | [-0.04-(-0.03)] | <0.01 |
|                                                         | CoM or MoC or<br>unknown        |  |  |  | 0.10  | [0.08-0.13]     | <0.01 | 0.08  | [0.06-0.11]     | <0.01 |
| Femoral head size<br>(≤28mm)                            | 32                              |  |  |  | <0.01 | [-0.01-0.01]    | 0.51  | -0.01 | [-0.01-<0.01]   | 0.10  |
|                                                         | 36-42                           |  |  |  | 0.03  | [0.02-0.04]     | <0.01 | 0.02  | [0.01-0.03]     | <0.01 |
|                                                         | ≥44                             |  |  |  | -0.03 | [-0.11-0.06]    | <0.01 | -0.04 | [-0.12-0.05]    | 0.37  |
| <i>Hospital organisation<br/>factors</i>                |                                 |  |  |  |       |                 |       |       |                 |       |

|                                                                        |                                                 |  |  |  |  |  |  |       |                 |       |
|------------------------------------------------------------------------|-------------------------------------------------|--|--|--|--|--|--|-------|-----------------|-------|
| Unit type (Public hospital)                                            | Private hospital                                |  |  |  |  |  |  | -0.22 | [-0.23-(-0.21)] | <0.01 |
|                                                                        | Independent sector (private) – treatment centre |  |  |  |  |  |  | -0.40 | [-0.41-(-0.38)] | <0.01 |
| FTE of speciality groups on trauma and orthopaedic surgery (0-24 FTEs) | 25-29                                           |  |  |  |  |  |  | 0.01  | [-0.01-0.02]    | 0.40  |
|                                                                        | 30-39                                           |  |  |  |  |  |  | 0.03  | [0.02-0.04]     | <0.01 |
|                                                                        | 40-49                                           |  |  |  |  |  |  | 0.03  | [0.01-0.04]     | <0.01 |
|                                                                        | >50                                             |  |  |  |  |  |  | 0.04  | [0.03-0.05]     | <0.01 |
| Consultant FTE (0-24 FTEs)                                             | 25-29                                           |  |  |  |  |  |  | 0.03  | [0.02-0.04]     | <0.01 |
|                                                                        | 30-39                                           |  |  |  |  |  |  | 0.04  | [0.03-0.05]     | <0.01 |
|                                                                        | 40-49                                           |  |  |  |  |  |  | 0.03  | [0.01-0.04]     | <0.01 |
|                                                                        | >50                                             |  |  |  |  |  |  | 0.04  | [0.02-0.06]     | <0.01 |

|                                                                                   |         |  |  |  |  |  |  |       |                 |       |
|-----------------------------------------------------------------------------------|---------|--|--|--|--|--|--|-------|-----------------|-------|
| middle grade doctor<br>FTE (0-24 FTEs)                                            | 25-29   |  |  |  |  |  |  | 0.01  | [<0.01-0.02]    | 0.15  |
|                                                                                   | 30-39   |  |  |  |  |  |  | <0.01 | [-0.01-0.01]    | 0.77  |
|                                                                                   | 40-49   |  |  |  |  |  |  | 0.01  | [<0.01-0.02]    | 0.10  |
|                                                                                   | >50     |  |  |  |  |  |  | 0.04  | [0.03-0.05]     | <0.01 |
| early career doctor FTE<br>(0-24 FTEs)                                            | 25-29   |  |  |  |  |  |  | -0.01 | [-0.03-0.01]    | 0.39  |
|                                                                                   | 30-39   |  |  |  |  |  |  | -0.05 | [-0.09-(-0.01)] | 0.01  |
| Total beds available<br>overnight (0-349)                                         | 350-499 |  |  |  |  |  |  | -0.04 | [-0.05-(-0.02)] | <0.01 |
|                                                                                   | 500-699 |  |  |  |  |  |  | -0.03 | [-0.04-(-0.01)] | <0.01 |
|                                                                                   | 700-999 |  |  |  |  |  |  | -0.05 | [-0.06-(-0.03)] | <0.01 |
|                                                                                   | ≥1000   |  |  |  |  |  |  | -0.09 | [-0.11-(-0.07)] | <0.01 |
| Total beds available<br>overnight for trauma<br>and orthopaedic<br>surgery (0-34) | 35-49   |  |  |  |  |  |  | 0.02  | [0.01-0.03]     | <0.01 |
|                                                                                   | 50-69   |  |  |  |  |  |  | 0.06  | [0.05-0.07]     | <0.01 |
|                                                                                   | 70-99   |  |  |  |  |  |  | 0.11  | [0.09-0.12]     | <0.01 |

|                                                             |       |  |  |  |  |  |  |       |                 |       |
|-------------------------------------------------------------|-------|--|--|--|--|--|--|-------|-----------------|-------|
|                                                             | ≥100  |  |  |  |  |  |  | 0.16  | [0.14-0.17]     | <0.01 |
| Total beds available<br>overnight for<br>rehabilitation (0) | >0-10 |  |  |  |  |  |  | 0.01  | [-0.01-0.02]    | 0.38  |
|                                                             | 11-20 |  |  |  |  |  |  | 0.01  | [<0.01-0.03]    | 0.02  |
|                                                             | ≥20   |  |  |  |  |  |  | 0.07  | [0.06-0.08]     | <0.01 |
| Operating theatres<br>(<10)                                 | 10-14 |  |  |  |  |  |  | 0.01  | [-0.01-0.02]    | 0.27  |
|                                                             | 15-19 |  |  |  |  |  |  | -0.02 | [-0.04-<0.01]   | 0.01  |
|                                                             | 20-24 |  |  |  |  |  |  | -0.09 | [-0.11-(-0.07)] | <0.01 |
|                                                             | ≥25   |  |  |  |  |  |  | -0.06 | [-0.08-(-0.04)] | <0.01 |
| Dedicated day case<br>operating theatres (≥7)               | 0     |  |  |  |  |  |  | 0.09  | [0.08-0.10]     | <0.01 |
|                                                             | 1-2   |  |  |  |  |  |  | 0.06  | [0.05-0.07]     | <0.01 |
|                                                             | 3-4   |  |  |  |  |  |  | 0.07  | [0.06-0.08]     | <0.01 |
|                                                             | 5-6   |  |  |  |  |  |  | 0.04  | [0.03-0.05]     | <0.01 |

American Society of Anesthesiologists, ASA; Index of multiple deprivation, IMD; European Quality of life-five domain, EQ-5D-3L; low-molecular-weight heparin, LMWH; total hip replacement, THR; metal-on-metal, MoM; metal-on-polyethylene, MoP; ceramic-on-ceramic, CoC; ceramic-on-polyethylene, CoP; ceramic-on-metal, CoM; metal-on-ceramic, MoC; full time equivalent, FTE (proportion of full time contracted hours).

**eTable 3.** Poisson Multilevel Models of Length of Stay for Patients Who Underwent Planned Primary TKR/UKR

|                                                                                               | Categories                   | Patient model |                 |       | Surgical model |                 |       | Hospital organisation model |                 |       |
|-----------------------------------------------------------------------------------------------|------------------------------|---------------|-----------------|-------|----------------|-----------------|-------|-----------------------------|-----------------|-------|
|                                                                                               |                              | Coef.         | 95% CI          | P     | Coef.          | 95% CI          | P     | Coef.                       | 95% CI          | P     |
| <i>Intercept</i>                                                                              |                              | 1.08          | [1.05-1.12]     | <0.01 | 0.83           | [0.79-0.87]     | <0.01 | 1.00                        | [0.96-1.03]     | <0.01 |
| <i>Patient factors</i>                                                                        |                              |               |                 |       |                |                 |       |                             |                 |       |
| Calendar year (2016)                                                                          | 2015                         | 0.08          | [0.08-0.09]     | <0.01 | 0.08           | [0.07-0.08]     | <0.01 | 0.07                        | [0.06-0.08]     | <0.01 |
|                                                                                               | 2016                         | 0.04          | [0.04-0.05]     | <0.01 | 0.04           | [0.03-0.04]     | <0.01 | 0.03                        | [0.03-0.04]     | <0.01 |
| Age (<50 years)                                                                               | 50-59                        | -0.01         | [-0.03-(-0.01)] | 0.11  | -0.04          | [-0.06-(-0.02)] | <0.01 | -0.03                       | [-0.05-(-0.01)] | <0.01 |
|                                                                                               | 60-69                        | 0.04          | [0.02-0.06]     | <0.01 | -0.01          | [-0.03-0.01]    | 0.33  | 0.01                        | [-0.01-0.03]    | 0.36  |
|                                                                                               | 70-79                        | 0.17          | [0.15-0.19]     | <0.01 | 0.11           | [0.09-0.13]     | <0.01 | 0.12                        | [0.11-0.14]     | <0.01 |
|                                                                                               | 80-84                        | 0.38          | [0.36-0.40]     | <0.01 | 0.31           | [0.29-0.33]     | <0.01 | 0.32                        | [0.30-0.34]     | <0.01 |
|                                                                                               | ≥85                          | 0.56          | [0.54-0.58]     | <0.01 | 0.49           | [0.48-0.51]     | <0.01 | 0.49                        | [0.47-0.51]     | <0.01 |
| Sex (woman)                                                                                   | man                          | -0.05         | [-0.05-(-0.04)] | <0.01 | -0.04          | [-0.05-(-0.04)] | <0.01 | -0.04                       | [-0.05-(-0.04)] | <0.01 |
| BMI, (kg/m <sup>2</sup> )                                                                     |                              | <0.01         | [<0.01-<0.01]   | <0.01 | <0.01          | [<0.01-<0.01]   | <0.01 | <0.01                       | [<0.01-<0.01]   | <0.01 |
| Pre-operative ASA<br>physical function score<br>(Mild disease not<br>incapacitating, grade 2) | Fit and healthy<br>(grade 1) | -0.06         | [-0.07-(-0.05)] | <0.01 | -0.05          | [-0.05-(-0.04)] | <0.01 | -0.03                       | [-0.04-(-0.03)] | <0.01 |

|                                                  |                                                                         |       |                 |       |       |                 |       |       |               |       |
|--------------------------------------------------|-------------------------------------------------------------------------|-------|-----------------|-------|-------|-----------------|-------|-------|---------------|-------|
|                                                  | Incapacitating systemic disease (grade 3)                               | 0.20  | [0.19-0.20]     | <0.01 | 0.18  | [0.18-0.19]     | <0.01 | 0.15  | [0.15-0.16]   | <0.01 |
|                                                  | Life threatening disease or Expected to die within 24h (grades 4 and 5) | 0.39  | [0.36-0.42]     | <0.01 | 0.37  | [0.34-0.40]     | <0.01 | 0.32  | [0.29-0.35]   | <0.01 |
| IMD (Most deprived 20%)                          | Least deprived 20%                                                      | -0.03 | [-0.04-(-0.02)] | <0.01 | -0.02 | [-0.03-(-0.01)] | <0.01 | -0.01 | [-0.02-<0.01] | 0.03  |
|                                                  | Less deprived 20-40%                                                    | -0.01 | [-0.02-<0.01]   | 0.02  | -0.01 | [-0.02-<0.01]   | 0.16  | <0.01 | [-0.01-0.01]  | 0.99  |
|                                                  | Less deprived 40-60%                                                    | -0.01 | [-0.02-<0.01]   | 0.22  | <0.01 | [-0.01-0.01]    | 0.38  | <0.01 | [-0.01-0.01]  | 0.52  |
|                                                  | More deprived 20-40%                                                    | <0.01 | [-0.01-0.01]    | 0.85  | <0.01 | [-0.01-0.01]    | 0.94  | <0.01 | [-0.01-0.01]  | 0.79  |
| Rural/Urban indicator (Urban >=10,000 habitants) | Town and fringe                                                         | -0.01 | [-0.02-<0.01]   | 0.20  | -0.01 | [-0.02-<0.01]   | 0.19  | <0.01 | [-0.01-0.01]  | 0.40  |



|                                                                  |                              |       |                 |       |       |                 |       |       |                 |       |
|------------------------------------------------------------------|------------------------------|-------|-----------------|-------|-------|-----------------|-------|-------|-----------------|-------|
|                                                                  | Village/isolated             | -0.02 | [-0.03-(-0.01)] | <0.01 | -0.02 | [-0.03-(-0.01)] | <0.01 | -0.01 | [-0.02-<0.01]   | 0.02  |
| Primary indication<br>(Osteoarthritis)                           | Osteoarthritis<br>and Other* | 0.16  | [0.15-0.18]     | <0.01 | 0.14  | [0.12-0.16]     | <0.01 | 0.11  | [0.09-0.13]     | <0.01 |
| Charlson score (None,<br>0)                                      | Mild (1)                     | 0.07  | [0.07-0.08]     | <0.01 | 0.08  | [0.07-0.08]     | <0.01 | 0.07  | [0.06-0.07]     | <0.01 |
|                                                                  | Moderate (2)                 | 0.18  | [0.17-0.19]     | <0.01 | 0.18  | [0.17-0.18]     | <0.01 | 0.16  | [0.15-0.16]     | <0.01 |
|                                                                  | Severe (≥3)                  | 0.31  | [0.30-0.32]     | <0.01 | 0.31  | [0.30-0.32]     | <0.01 | 0.28  | [0.27-0.29]     | <0.01 |
| EQ-5D-3L (Lowest<br>quintile)                                    | 2nd quintile                 | -0.10 | [-0.11-(-0.10)] | <0.01 | -0.10 | [-0.11-(-0.09)] | <0.01 | -0.10 | [-0.10-(-0.09)] | <0.01 |
|                                                                  | 3rd quintile                 | -0.13 | [-0.14-(-0.13)] | <0.01 | -0.13 | [-0.14-(-0.12)] | <0.01 | -0.12 | [-0.13-(-0.12)] | <0.01 |
|                                                                  | 4th quintile                 | -0.16 | [-0.17-(-0.15)] | <0.01 | -0.15 | [-0.16-(-0.14)] | <0.01 | -0.14 | [-0.15-(-0.13)] | <0.01 |
|                                                                  | Highest quintile             | -0.20 | [-0.21-(-0.19)] | <0.01 | -0.19 | [-0.20-(-0.19)] | <0.01 | -0.18 | [-0.19-(-0.18)] | <0.01 |
| <i>Surgical factors</i>                                          |                              |       |                 |       |       |                 |       |       |                 |       |
| Lead surgeon<br>experience<br>(Consultant)                       | Other**                      |       |                 |       | 0.09  | [0.08-0.09]     | <0.01 | 0.01  | [<0.01-0.02]    | <0.01 |
| Surgical volume per<br>lead surgeon (>150<br>surgeries per year) | ≤10                          |       |                 |       | 0.10  | [0.08-0.12]     | <0.01 | 0.02  | [0.01-0.04]     | 0.01  |

|                                                            |                 |  |  |  |       |                 |       |       |                 |       |
|------------------------------------------------------------|-----------------|--|--|--|-------|-----------------|-------|-------|-----------------|-------|
|                                                            | 11-50           |  |  |  | 0.08  | [0.07-0.08]     | <0.01 | 0.01  | [0.01-0.02]     | <0.01 |
|                                                            | 51-75           |  |  |  | 0.07  | [0.06-0.08]     | <0.01 | 0.02  | [0.01-0.03]     | <0.01 |
|                                                            | 76-100          |  |  |  | 0.05  | [0.05-0.06]     | <0.01 | 0.01  | [<0.01-0.02]    | <0.01 |
|                                                            | 101-150         |  |  |  | 0.03  | [0.02-0.04]     | <0.01 | <0.01 | [-0.01-0.01]    | 0.69  |
| Surgical volume per unit (Surgeries per year, $\geq 500$ ) | $\leq 200$      |  |  |  | 0.06  | [0.05-0.07]     | <0.01 | 0.10  | [0.09-0.11]     | <0.01 |
|                                                            | 200-299         |  |  |  | 0.01  | [<0.01-0.01]    | 0.24  | 0.01  | [<0.01-0.02]    | <0.01 |
|                                                            | 300-399         |  |  |  | -0.03 | [-0.04-(-0.02)] | <0.01 | -0.02 | [-0.03-(-0.02)] | <0.01 |
|                                                            | 400-499         |  |  |  | -0.03 | [-0.04-(-0.02)] | <0.01 | -0.02 | [-0.03-(-0.01)] | <0.01 |
| Minimally invasive surgery (No)                            | Yes             |  |  |  | -0.05 | [-0.07-(-0.04)] | <0.01 | -0.04 | [-0.05-(-0.03)] | <0.01 |
| Thromboprophylaxis (LMWH +/-Other)                         | None            |  |  |  | -0.05 | [-0.07-(-0.03)] | <0.01 | -0.02 | [-0.04-0.01]    | 0.19  |
|                                                            | Aspirin only    |  |  |  | -0.02 | [-0.04-(-0.01)] | 0.01  | -0.02 | [-0.03-<0.01]   | 0.01  |
|                                                            | Other (no LMWH) |  |  |  | -0.01 | [-0.02-(-0.01)] | <0.01 | 0.01  | [<0.01-0.02]    | <0.01 |
| Mechanical prophylaxis (any)                               | None            |  |  |  | 0.08  | [0.06-0.09]     | <0.01 | 0.02  | [<0.01-0.03]    | 0.02  |

|                                            |                         |  |  |  |       |                 |       |       |                 |       |
|--------------------------------------------|-------------------------|--|--|--|-------|-----------------|-------|-------|-----------------|-------|
| General anaesthesia<br>(No)                | Yes                     |  |  |  | 0.05  | [0.05-0.06]     | <0.01 | 0.05  | [0.05-0.06]     | <0.01 |
| Regional – epidural<br>anaesthesia (No)    | Yes                     |  |  |  | 0.04  | [0.03-0.05]     | <0.01 | 0.02  | [0.01-0.03]     | <0.01 |
| Regional – nerve block<br>anaesthesia (No) | Yes                     |  |  |  | 0.04  | [0.04-0.05]     | <0.01 | 0.03  | [0.02-0.04]     | <0.01 |
| Regional – spinal<br>anaesthesia (No)      | Yes                     |  |  |  |       |                 |       |       |                 |       |
| Type of approach<br>(Medial parapatellar)  | Lateral<br>parapatellar |  |  |  | 0.09  | [0.06-0.11]     | <0.01 | 0.07  | [0.05-0.09]     | <0.01 |
|                                            | Mid-Vastus              |  |  |  | -0.06 | [-0.07-(-0.05)] | <0.01 | -0.07 | [-0.08-(-0.05)] | <0.01 |
|                                            | Sub-Vastus              |  |  |  | -0.05 | [-0.07-(-0.02)] | <0.01 | -0.03 | [-0.05-(-0.01)] | 0.01  |
|                                            | Other                   |  |  |  | 0.04  | [0.02-0.06]     | <0.01 | 0.04  | [0.02-0.06]     | <0.01 |
| Femoral bone graft<br>(No)                 | Yes                     |  |  |  | 0.02  | [<0.01-0.04]    | 0.04  | 0.03  | [<0.01-0.05]    | 0.02  |
| Tibia bone graft (No)                      | Yes                     |  |  |  | 0.10  | [0.07-0.14]     | <0.01 | 0.09  | [0.05-0.12]     | <0.01 |
| Primary femoral<br>fixation (Cemented)     | Cementless              |  |  |  |       |                 |       |       |                 |       |

|                                                                        |                                                 |  |  |  |      |             |       |       |                 |       |
|------------------------------------------------------------------------|-------------------------------------------------|--|--|--|------|-------------|-------|-------|-----------------|-------|
| Primary Tibial fixation<br>(Cemented)                                  | Cementless                                      |  |  |  |      |             |       |       |                 |       |
| Type of knee implant<br>(TKR)                                          | UKR                                             |  |  |  | 0.26 | [0.25-0.28] | <0.01 | 0.28  | [0.27-0.29]     | <0.01 |
| <i>Hospital organisation factors</i>                                   |                                                 |  |  |  |      |             |       |       |                 |       |
| Unit type (Public hospital)                                            | Private hospital                                |  |  |  |      |             |       | -0.26 | [-0.27-(-0.26)] | <0.01 |
|                                                                        | Independent sector (private) – treatment centre |  |  |  |      |             |       | -0.44 | [-0.45-(-0.42)] | <0.01 |
| FTE of speciality groups on trauma and orthopaedic surgery (0-24 FTEs) | 25-29                                           |  |  |  |      |             |       | 0.02  | [0.01-0.03]     | <0.01 |
|                                                                        | 30-39                                           |  |  |  |      |             |       | 0.02  | [0.02-0.03]     | <0.01 |
|                                                                        | 40-49                                           |  |  |  |      |             |       | 0.05  | [0.04-0.06]     | <0.01 |
|                                                                        | >50                                             |  |  |  |      |             |       | 0.06  | [0.05-0.07]     | <0.01 |

|                                        |         |  |  |  |  |  |  |       |                 |       |
|----------------------------------------|---------|--|--|--|--|--|--|-------|-----------------|-------|
| Consultant FTE (0-24 FTEs)             | 25-29   |  |  |  |  |  |  | 0.02  | [0.01-0.03]     | <0.01 |
|                                        | 30-39   |  |  |  |  |  |  | 0.01  | [<0.01-0.02]    | 0.02  |
|                                        | 40-49   |  |  |  |  |  |  | 0.02  | [0.01-0.03]     | <0.01 |
|                                        | >50     |  |  |  |  |  |  | 0.04  | [0.02-0.05]     | <0.01 |
| middle grade doctor FTE (0-24 FTEs)    | 25-29   |  |  |  |  |  |  | 0.01  | [<0.01-0.02]    | 0.01  |
|                                        | 30-39   |  |  |  |  |  |  | 0.04  | [0.03-0.05]     | <0.01 |
|                                        | 40-49   |  |  |  |  |  |  | 0.03  | [0.02-0.05]     | <0.01 |
|                                        | >50     |  |  |  |  |  |  | 0.04  | [0.02-0.06]     | <0.01 |
| early career doctor FTE (0-24 FTEs)    | 25-29   |  |  |  |  |  |  |       |                 |       |
|                                        | 30-39   |  |  |  |  |  |  |       |                 |       |
| Total beds available overnight (0-349) | 350-499 |  |  |  |  |  |  | -0.03 | [-0.04-(-0.02)] | <0.01 |
|                                        | 500-699 |  |  |  |  |  |  | -0.06 | [-0.07-(-0.05)] | <0.01 |
|                                        | 700-999 |  |  |  |  |  |  | -0.08 | [-0.09-(-0.06)] | <0.01 |
|                                        | ≥1000   |  |  |  |  |  |  | -0.10 | [-0.12-(-0.08)] | <0.01 |

|                                                                          |       |  |  |  |  |  |  |       |                 |       |
|--------------------------------------------------------------------------|-------|--|--|--|--|--|--|-------|-----------------|-------|
| Total beds available overnight for trauma and orthopaedic surgery (0-34) | 35-49 |  |  |  |  |  |  | 0.02  | [0.01-0.03]     | <0.01 |
|                                                                          | 50-69 |  |  |  |  |  |  | 0.03  | [0.03-0.04]     | <0.01 |
|                                                                          | 70-99 |  |  |  |  |  |  | 0.04  | [0.02-0.05]     | <0.01 |
|                                                                          | ≥100  |  |  |  |  |  |  | 0.05  | [0.03-0.07]     | <0.01 |
| Total beds available overnight for rehabilitation (0)                    | >0-10 |  |  |  |  |  |  | <0.01 | [-0.02-0.01]    | 0.92  |
|                                                                          | 11-20 |  |  |  |  |  |  | <0.01 | [-0.02-0.01]    | 0.60  |
|                                                                          | ≥20   |  |  |  |  |  |  | 0.03  | [0.02-0.04]     | <0.01 |
| Operating theatres (<10)                                                 | 10-14 |  |  |  |  |  |  | -0.02 | [-0.02-(-0.01)] | <0.01 |
|                                                                          | 15-19 |  |  |  |  |  |  | -0.01 | [-0.02-<0.01]   | 0.19  |
|                                                                          | 20-24 |  |  |  |  |  |  | -0.04 | [-0.06-(-0.03)] | <0.01 |
|                                                                          | ≥25   |  |  |  |  |  |  | -0.06 | [-0.08-(-0.04)] | <0.01 |
| Dedicated day case operating theatres (≥7)                               | 0     |  |  |  |  |  |  | <0.01 | [-0.01-0.01]    | 0.37  |

|  |     |  |  |  |  |  |  |       |              |      |
|--|-----|--|--|--|--|--|--|-------|--------------|------|
|  | 1-2 |  |  |  |  |  |  | 0.01  | [<0.01-0.01] | 0.22 |
|  | 3-4 |  |  |  |  |  |  | <0.01 | [-0.01-0.01] | 0.51 |
|  | 5-6 |  |  |  |  |  |  | 0.01  | [<0.01-0.02] | 0.01 |

Total knee replacement, TKR; Unicompartmental knee replacement, UKR; American Society of Anesthesiologists, ASA; Index of multiple deprivation, IMD; European Quality of life-five domain, EQ-5D-3L; low-molecular-weight heparin, LMWH; full time equivalent, FTE (proportion of full time contracted hours).

**eTable 4.** Correlation Coefficients ( $\rho$ ) of Hospital Organizational Factors vs Predicted Outcomes of Surgery for Patients Undergoing Primary Joint Replacement, 2014-2016, England, United Kingdom

|                                                                   | primary hip replacement |               |        |               | primary TKR/UKR |               |        |               |
|-------------------------------------------------------------------|-------------------------|---------------|--------|---------------|-----------------|---------------|--------|---------------|
| Mean values by centre and health area                             | LOS                     | Bed-day costs | OHS    | Complications | LOS             | Bed-day costs | OKS    | Complications |
| Surgical volume per lead surgeon (number of surgeries per year)   | <b>-0.36</b>            | <b>-0.34</b>  | 0.03   | <b>-0.40</b>  | <b>-0.40</b>    | <b>-0.39</b>  | 0.11   | <b>-0.37</b>  |
| Surgical volume per unit (number of surgeries per year)           | -0.05                   | -0.04         | -0.04  | <b>-0.38</b>  | 0.05            | 0.05          | -0.01  | -0.26         |
| Public hospital (%)                                               | <b>0.41</b>             | <b>0.40</b>   | -0.14  | 0.22          | <b>0.44</b>     | <b>0.43</b>   | -0.19  | 0.27          |
| Private hospital (%)                                              | <b>-0.37</b>            | <b>-0.35</b>  | 0.07   | -0.27         | <b>-0.38</b>    | <b>-0.35</b>  | 0.12   | -0.25         |
| ISTC (%)                                                          | -0.15                   | -0.17         | 0.15   | 0.04          | -0.19           | -0.21         | 0.15   | -0.09         |
| FTE of speciality groups on trauma and orthopaedic surgery        | 0.11                    | 0.10          | -0.06  | -0.08         | 0.10            | 0.11          | 0.02   | 0.05          |
| consultants FTE                                                   | 0.12                    | 0.09          | -0.12  | 0.09          | 0.14            | 0.13          | -0.06  | 0.14          |
| middle grade doctor FTE                                           | 0.26                    | 0.23          | -0.18  | 0.20          | 0.20            | 0.21          | -0.11  | 0.19          |
| early career doctor FTE                                           | 0.27                    | 0.27          | -0.08  | 0.21          | 0.10            | 0.08          | -0.04  | 0.19          |
| Total beds available overnight                                    | 0.05                    | 0.01          | -0.06  | 0.09          | 0.01            | 0.01          | 0.03   | 0.12          |
| Total beds available overnight for trauma and orthopaedic surgery | -0.03                   | -0.04         | -0.003 | -0.18         | -0.08           | -0.07         | 0.16   | -0.05         |
| Total beds available overnight for rehabilitation                 | 0.10                    | 0.09          | -0.04  | -0.0003       | 0.02            | 0.03          | 0.07   | -0.09         |
| Operating theatres                                                | 0.08                    | 0.05          | -0.04  | 0.09          | 0.10            | 0.10          | 0.01   | 0.11          |
| Dedicated day case operating theatres                             | -0.04                   | -0.04         | -0.003 | 0.06          | 0.01            | 0.02          | -0.003 | -0.05         |

LOS, length of stay; OHS, Oxford hip score; OKS, Oxford knee score; FTE (proportion of full time contracted hours); ISTC, independent sector treatment centre; TKR, total knee replacement; UKR, unicompartmental knee replacement.



**eTable 5.** Poisson Multilevel Models of Bed-Day Costs for Patients Who Underwent Planned Primary Hip Replacement

|                                                                                               | Categories                   | Patient model |                 |       | Surgical model |                 |       | Hospital organisation model |                 |       |
|-----------------------------------------------------------------------------------------------|------------------------------|---------------|-----------------|-------|----------------|-----------------|-------|-----------------------------|-----------------|-------|
|                                                                                               |                              | Coef.         | 95% CI          | P     | Coef.          | 95% CI          | P     | Coef.                       | 95% CI          | P     |
| <i>Intercept</i>                                                                              |                              | 8.68          | [8.67-8.70]     | <0.01 | 8.67           | [8.65-8.68]     | <0.01 | 8.66                        | [8.65-8.67]     | <0.01 |
| <i>Patient factors</i>                                                                        |                              |               |                 |       |                |                 |       |                             |                 |       |
| Calendar year (2016)                                                                          | 2015                         | 0.08          | [0.08-0.08]     | <0.01 | 0.07           | [0.07-0.07]     | <0.01 | 0.06                        | [0.06-0.06]     | <0.01 |
|                                                                                               | 2016                         | 0.04          | [0.04-0.04]     | <0.01 | 0.03           | [0.03-0.03]     | <0.01 | 0.03                        | [0.03-0.03]     | <0.01 |
| Age (<50 years)                                                                               | 50-59                        | <0.01         | [<0.01-<0.01]   | <0.01 | <0.01          | [<0.01-<0.01]   | <0.01 | 0.01                        | [0.01-0.01]     | <0.01 |
|                                                                                               | 60-69                        | 0.02          | [0.02-0.02]     | <0.01 | 0.01           | [0.01-0.01]     | <0.01 | 0.03                        | [0.03-0.03]     | <0.01 |
|                                                                                               | 70-79                        | 0.12          | [0.12-0.12]     | <0.01 | 0.10           | [0.09-0.10]     | <0.01 | 0.11                        | [0.11-0.11]     | <0.01 |
|                                                                                               | 80-84                        | 0.28          | [0.28-0.28]     | <0.01 | 0.25           | [0.25-0.25]     | <0.01 | 0.26                        | [0.26-0.26]     | <0.01 |
|                                                                                               | ≥85                          | 0.44          | [0.44-0.44]     | <0.01 | 0.41           | [0.41-0.41]     | <0.01 | 0.42                        | [0.42-0.42]     | <0.01 |
| Sex (woman)                                                                                   | man                          | -0.09         | [-0.09-(-0.09)] | <0.01 | -0.09          | [-0.09-(-0.09)] | <0.01 | -0.09                       | [-0.09-(-0.09)] | <0.01 |
| BMI, (kg/m <sup>2</sup> )                                                                     |                              | <0.01         | [<0.01-<0.01]   | <0.01 | <0.01          | [<0.01-<0.01]   | <0.01 | <0.01                       | [<0.01-<0.01]   | 0.01  |
| Pre-operative ASA<br>physical function score<br>(Mild disease not<br>incapacitating, grade 2) | Fit and healthy<br>(grade 1) | -0.02         | [-0.02-(-0.02)] | <0.01 | -0.02          | [-0.02-(-0.02)] | <0.01 | -0.02                       | [-0.02-(-0.02)] | <0.01 |

|                                                  |                                                                         |       |                 |       |       |                 |       |       |                 |       |
|--------------------------------------------------|-------------------------------------------------------------------------|-------|-----------------|-------|-------|-----------------|-------|-------|-----------------|-------|
|                                                  | Incapacitating systemic disease (grade 3)                               | 0.12  | [0.12-0.12]     | <0.01 | 0.11  | [0.11-0.12]     | <0.01 | 0.09  | [0.09-0.09]     | <0.01 |
|                                                  | Life threatening disease or Expected to die within 24h (grades 4 and 5) | 0.23  | [0.23-0.23]     | <0.01 | 0.21  | [0.21-0.22]     | <0.01 | 0.18  | [0.18-0.18]     | <0.01 |
| IMD (Most deprived 20%)                          | Least deprived 20%                                                      | -0.03 | [-0.04-(-0.02)] | <0.01 | -0.02 | [-0.03-(-0.01)] | <0.01 | -0.02 | [-0.03-(-0.01)] | <0.01 |
|                                                  | Less deprived 20-40%                                                    | -0.02 | [-0.03-(-0.01)] | <0.01 | -0.02 | [-0.03-(-0.01)] | <0.01 | -0.01 | [-0.02-<0.01]   | 0.01  |
|                                                  | Less deprived 40-60%                                                    | -0.01 | [-0.02-<0.01]   | 0.07  | -0.01 | [-0.02-<0.01]   | 0.05  | -0.01 | [-0.02-<0.01]   | 0.04  |
|                                                  | More deprived 20-40%                                                    | -0.01 | [-0.02-<0.01]   | 0.08  | -0.01 | [-0.02-<0.01]   | 0.08  | -0.01 | [-0.02-<0.01]   | 0.08  |
| Rural/Urban indicator (Urban >=10,000 habitants) | Town and fringe                                                         | 0.01  | [0.01-0.01]     | <0.01 | 0.01  | [0.01-0.01]     | <0.01 | 0.01  | [0.01-0.01]     | <0.01 |

|                                                                  |                              |       |                 |       |       |                 |       |       |                 |       |
|------------------------------------------------------------------|------------------------------|-------|-----------------|-------|-------|-----------------|-------|-------|-----------------|-------|
|                                                                  | Village/isolated             | 0.01  | [0.01-0.01]     | <0.01 | 0.01  | [0.01-0.01]     | <0.01 | 0.01  | [<0.01-0.01]    | <0.01 |
| Primary indication<br>(Osteoarthritis)                           | Osteoarthritis<br>and Other* | 0.12  | [0.12-0.12]     | <0.01 | 0.11  | [0.11-0.12]     | <0.01 | 0.09  | [0.09-0.09]     | <0.01 |
| Charlson score (None,<br>0)                                      | Mild (1)                     | 0.01  | [0.01-0.01]     | <0.01 | 0.01  | [0.01-0.01]     | <0.01 | 0.01  | [0.01-0.01]     | <0.01 |
|                                                                  | Moderate (2)                 | 0.05  | [0.05-0.05]     | <0.01 | 0.05  | [0.05-0.05]     | <0.01 | 0.04  | [0.03-0.04]     | <0.01 |
|                                                                  | Severe (≥3)                  | 0.10  | [0.10-0.10]     | <0.01 | 0.09  | [0.09-0.09]     | <0.01 | 0.08  | [0.08-0.08]     | <0.01 |
| EQ-5D-3L (Highest<br>quintile)                                   | Lowest quintile              | -0.09 | [-0.09-(-0.09)] | <0.01 | -0.09 | [-0.09-(-0.09)] | <0.01 | -0.09 | [-0.09-(-0.09)] | <0.01 |
|                                                                  | 2nd quintile                 | -0.12 | [-0.12-(-0.12)] | <0.01 | -0.11 | [-0.11-(-0.11)] | <0.01 | -0.11 | [-0.11-(-0.11)] | <0.01 |
|                                                                  | 3rd quintile                 | -0.14 | [-0.14-(-0.14)] | <0.01 | -0.13 | [-0.13-(-0.13)] | <0.01 | -0.13 | [-0.13-(-0.13)] | <0.01 |
|                                                                  | 4th quintile                 | -0.16 | [-0.16-(-0.16)] | <0.01 | -0.16 | [-0.16-(-0.16)] | <0.01 | -0.15 | [-0.15-(-0.15)] | <0.01 |
| <i>Surgical factors</i>                                          |                              |       |                 |       |       |                 |       |       |                 |       |
| Lead surgeon<br>experience<br>(Consultant)                       | Other**                      |       |                 |       | 0.07  | [0.07-0.07]     | <0.01 | 0.02  | [0.02-0.02]     | <0.01 |
| Surgical volume per<br>lead surgeon (>150<br>surgeries per year) | ≤10                          |       |                 |       | 0.07  | [0.07-0.07]     | <0.01 | 0.02  | [0.02-0.02]     | <0.01 |

|                                                            |                 |  |  |  |       |                 |       |       |                 |       |
|------------------------------------------------------------|-----------------|--|--|--|-------|-----------------|-------|-------|-----------------|-------|
|                                                            | 11-50           |  |  |  | 0.06  | [0.06-0.06]     | <0.01 | 0.02  | [0.02-0.02]     | <0.01 |
|                                                            | 51-75           |  |  |  | 0.03  | [0.03-0.03]     | <0.01 | 0.01  | [0.01-0.01]     | <0.01 |
|                                                            | 76-100          |  |  |  | 0.02  | [0.02-0.02]     | <0.01 | <0.01 | [<0.01-<0.01]   | 0.02  |
|                                                            | 101-150         |  |  |  | 0.02  | [0.02-0.02]     | <0.01 | 0.01  | [0.01-0.01]     | <0.01 |
| Surgical volume per unit (Surgeries per year, $\geq 500$ ) | $\leq 200$      |  |  |  | 0.05  | [0.05-0.05]     | <0.01 | 0.11  | [0.11-0.11]     | <0.01 |
|                                                            | 200-299         |  |  |  | 0.01  | [0.01-0.01]     | <0.01 | 0.05  | [0.05-0.06]     | <0.01 |
|                                                            | 300-399         |  |  |  | -0.02 | [-0.02-(-0.02)] | <0.01 | 0.02  | [0.02-0.02]     | <0.01 |
|                                                            | 400-499         |  |  |  | -0.01 | [-0.01-(-0.01)] | <0.01 | 0.05  | [0.05-0.05]     | <0.01 |
| Minimally invasive surgery (No)                            | Yes             |  |  |  | -0.04 | [-0.04-(-0.04)] | <0.01 | -0.03 | [-0.03-(-0.03)] | <0.01 |
| Thromboprophylaxis (LMWH +/-Other)                         | None            |  |  |  | <0.01 | [<0.01-<0.01]   | <0.01 | 0.02  | [0.02-0.02]     | <0.01 |
|                                                            | Aspirin only    |  |  |  | -0.02 | [-0.02-(-0.02)] | <0.01 | -0.01 | [-0.01-(-0.01)] | <0.01 |
|                                                            | Other (no LMWH) |  |  |  | -0.02 | [-0.02-(-0.02)] | <0.01 | <0.01 | [<0.01-<0.01]   | <0.01 |
| Mechanical prophylaxis (any)                               | None            |  |  |  | 0.05  | [0.05-0.05]     | <0.01 | 0.01  | [0.01-0.01]     | <0.01 |

|                                            |                                                                                              |  |  |  |       |                 |       |       |                 |       |
|--------------------------------------------|----------------------------------------------------------------------------------------------|--|--|--|-------|-----------------|-------|-------|-----------------|-------|
| General anaesthesia<br>(No)                | Yes                                                                                          |  |  |  | 0.04  | [0.03-0.04]     | <0.01 | 0.03  | [0.03-0.03]     | <0.01 |
| Regional – epidural<br>anaesthesia (No)    | Yes                                                                                          |  |  |  | 0.01  | [0.01-0.01]     | <0.01 | <0.01 | [<0.01-<0.01]   | <0.01 |
| Regional – nerve block<br>anaesthesia (No) | Yes                                                                                          |  |  |  | 0.04  | [0.04-0.04]     | <0.01 | 0.03  | [0.03-0.03]     | <0.01 |
| Regional – spinal<br>anaesthesia (No)      | Yes                                                                                          |  |  |  | -0.02 | [-0.02-(-0.02)] | <0.01 | -0.02 | [-0.02-(-0.02)] | <0.01 |
| Type of approach<br>(Posterior)            | Anterior,<br>antero-lateral,<br>hardinge,<br>lateral,<br>trochanteric<br>osteotomy,<br>other |  |  |  | 0.05  | [0.05-0.05]     | <0.01 | 0.05  | [0.05-0.05]     | <0.01 |
| Femoral bone graft<br>(No)                 | Yes                                                                                          |  |  |  | 0.04  | [0.04-0.04]     | <0.01 | 0.04  | [0.04-0.05]     | <0.01 |
| Cup bone graft (No)                        | Yes                                                                                          |  |  |  | 0.05  | [0.05-0.05]     | <0.01 | 0.04  | [0.04-0.04]     | <0.01 |

|                                                         |                                 |  |  |  |       |                 |       |       |                 |       |
|---------------------------------------------------------|---------------------------------|--|--|--|-------|-----------------|-------|-------|-----------------|-------|
| Primary cup fixation<br>(Cementless)                    | Cemented                        |  |  |  | -0.01 | [-0.01-(-0.01)] | <0.01 | -0.01 | [-0.01-(-0.01)] | <0.01 |
| Type of primary stem<br>fixation (Cemented<br>THR stem) | Not available or<br>Resurfacing |  |  |  | -0.01 | [-0.01-(-0.01)] | <0.01 | <0.01 | [-0.01-0.01]    | <0.01 |
|                                                         | Cementless<br>THR stem          |  |  |  | -0.05 | [-0.05-(-0.05)] | <0.01 | -0.03 | [-0.03-(-0.03)] | <0.01 |
| Bearing surface (MoP)                                   | MoM                             |  |  |  | -0.03 | [-0.03-(-0.03)] | <0.01 | -0.08 | [-0.08-(-0.07)] | <0.01 |
|                                                         | CoC                             |  |  |  | <0.01 | [-0.01-(-0.01)] | <0.01 | -0.02 | [-0.02-(-0.02)] | <0.01 |
|                                                         | CoP                             |  |  |  | -0.01 | [-0.01-(-0.01)] | <0.01 | -0.02 | [-0.02-(-0.02)] | <0.01 |
|                                                         | CoM or MoC or<br>unknown        |  |  |  | 0.07  | [0.07-0.07]     | <0.01 | 0.05  | [0.05-0.05]     | <0.01 |
| Femoral head size<br>(≤28mm)                            | 32                              |  |  |  | <0.01 | [-0.01-(-0.01)] | <0.01 | <0.01 | [-0.01-(-0.01)] | <0.01 |
|                                                         | 36-42                           |  |  |  | 0.02  | [0.02-0.02]     | <0.01 | 0.02  | [0.02-0.02]     | <0.01 |
|                                                         | ≥44                             |  |  |  | 0.02  | [0.01-0.02]     | <0.01 | 0.01  | [-0.01-0.01]    | <0.01 |
| <i>Hospital organisation<br/>factors</i>                |                                 |  |  |  |       |                 |       |       |                 |       |

|                                                                        |                                                 |  |  |  |  |  |  |       |                 |       |
|------------------------------------------------------------------------|-------------------------------------------------|--|--|--|--|--|--|-------|-----------------|-------|
| Unit type (Public hospital)                                            | Private hospital                                |  |  |  |  |  |  | -0.15 | [-0.15-(-0.14)] | <0.01 |
|                                                                        | Independent sector (private) – treatment centre |  |  |  |  |  |  | -0.29 | [-0.29-(-0.29)] | <0.01 |
| FTE of speciality groups on trauma and orthopaedic surgery (0-24 FTEs) | 25-29                                           |  |  |  |  |  |  | <0.01 | [<0.01-<0.01]   | <0.01 |
|                                                                        | 30-39                                           |  |  |  |  |  |  | 0.02  | [0.02-0.02]     | <0.01 |
|                                                                        | 40-49                                           |  |  |  |  |  |  | 0.01  | [0.01-0.01]     | <0.01 |
|                                                                        | >50                                             |  |  |  |  |  |  | 0.03  | [0.03-0.03]     | <0.01 |
| Consultant FTE (0-24 FTEs)                                             | 25-29                                           |  |  |  |  |  |  | 0.01  | [0.01-0.01]     | <0.01 |
|                                                                        | 30-39                                           |  |  |  |  |  |  | 0.03  | [0.03-0.03]     | <0.01 |
|                                                                        | 40-49                                           |  |  |  |  |  |  | 0.02  | [0.02-0.02]     | <0.01 |
|                                                                        | >50                                             |  |  |  |  |  |  | 0.03  | [0.03-0.03]     | <0.01 |

|                                                                                   |         |  |  |  |  |  |  |       |                 |       |
|-----------------------------------------------------------------------------------|---------|--|--|--|--|--|--|-------|-----------------|-------|
| middle grade doctor<br>FTE (0-24 FTEs)                                            | 25-29   |  |  |  |  |  |  | 0.01  | [0.01-0.01]     | <0.01 |
|                                                                                   | 30-39   |  |  |  |  |  |  | <0.01 | [<0.01-<0.01]   | <0.01 |
|                                                                                   | 40-49   |  |  |  |  |  |  | 0.01  | [0.01-0.01]     | <0.01 |
|                                                                                   | >50     |  |  |  |  |  |  | 0.02  | [0.02-0.02]     | <0.01 |
| early career doctor FTE<br>(0-24 FTEs)                                            | 25-29   |  |  |  |  |  |  | <0.01 | [<0.01-<0.01]   | <0.01 |
|                                                                                   | 30-39   |  |  |  |  |  |  | -0.05 | [-0.05-(-0.05)] | <0.01 |
| Total beds available<br>overnight (0-349)                                         | 350-499 |  |  |  |  |  |  | -0.03 | [-0.03-(-0.03)] | <0.01 |
|                                                                                   | 500-699 |  |  |  |  |  |  | -0.03 | [-0.03-(-0.03)] | <0.01 |
|                                                                                   | 700-999 |  |  |  |  |  |  | -0.04 | [-0.04-(-0.04)] | <0.01 |
|                                                                                   | ≥1000   |  |  |  |  |  |  | -0.07 | [-0.07-(-0.07)] | <0.01 |
| Total beds available<br>overnight for trauma<br>and orthopaedic<br>surgery (0-34) | 35-49   |  |  |  |  |  |  | 0.02  | [0.02-0.02]     | <0.01 |
|                                                                                   | 50-69   |  |  |  |  |  |  | 0.05  | [0.05-0.05]     | <0.01 |
|                                                                                   | 70-99   |  |  |  |  |  |  | 0.08  | [0.08-0.08]     | <0.01 |



|                                                             |       |  |  |  |  |  |  |       |                 |       |
|-------------------------------------------------------------|-------|--|--|--|--|--|--|-------|-----------------|-------|
|                                                             | ≥100  |  |  |  |  |  |  | 0.12  | [0.12-0.12]     | <0.01 |
| Total beds available<br>overnight for<br>rehabilitation (0) | >0-10 |  |  |  |  |  |  | <0.01 | [<0.01-<0.01]   | <0.01 |
|                                                             | 11-20 |  |  |  |  |  |  | 0.01  | [0.01-0.01]     | <0.01 |
|                                                             | ≥20   |  |  |  |  |  |  | 0.06  | [0.06-0.06]     | <0.01 |
| Operating theatres<br>(<10)                                 | 10-14 |  |  |  |  |  |  | 0.01  | [0.01-0.01]     | <0.01 |
|                                                             | 15-19 |  |  |  |  |  |  | -0.02 | [-0.02-(-0.02)] | <0.01 |
|                                                             | 20-24 |  |  |  |  |  |  | -0.06 | [-0.06-(-0.06)] | <0.01 |
|                                                             | ≥25   |  |  |  |  |  |  | -0.05 | [-0.05-(-0.05)] | <0.01 |
| Dedicated day case<br>operating theatres (≥7)               | 0     |  |  |  |  |  |  | 0.05  | [0.05-0.05]     | <0.01 |
|                                                             | 1-2   |  |  |  |  |  |  | 0.04  | [0.04-0.04]     | <0.01 |
|                                                             | 3-4   |  |  |  |  |  |  | 0.04  | [0.04-0.04]     | <0.01 |
|                                                             | 5-6   |  |  |  |  |  |  | 0.02  | [0.02-0.02]     | <0.01 |

American Society of Anesthesiologists, ASA; Index of multiple deprivation, IMD; European Quality of life-five domain, EQ-5D-3L; low-molecular-weight heparin, LMWH; total hip replacement, THR; metal-on-metal, MoM; metal-on-polyethylene, MoP; ceramic-on-ceramic, CoC; ceramic-on-polyethylene, CoP; ceramic-on-metal, CoM; metal-on-ceramic, MoC; full time equivalent, FTE (proportion of full time contracted hours).

**eTable 6.** Poisson Multilevel Models of Bed-Day Costs for Patients Who Underwent Planned Primary TKR/UKR

|                                                                                               | Categories                   | Patient model |                 |       | Surgical model |                 |       | Hospital organisation model |                 |       |
|-----------------------------------------------------------------------------------------------|------------------------------|---------------|-----------------|-------|----------------|-----------------|-------|-----------------------------|-----------------|-------|
|                                                                                               |                              | Coef.         | 95% CI          | P     | Coef.          | 95% CI          | P     | Coef.                       | 95% CI          | P     |
| <i>Intercept</i>                                                                              |                              | 8.55          | [8.53-8.57]     | <0.01 | 8.35           | [8.34-8.37]     | <0.01 | 8.47                        | [8.46-8.49]     | <0.01 |
| <i>Patient factors</i>                                                                        |                              |               |                 |       |                |                 |       |                             |                 |       |
| Calendar year (2016)                                                                          | 2015                         | 0.07          | [0.07-0.07]     | <0.01 | 0.06           | [0.06-0.06]     | <0.01 | 0.06                        | [0.06-0.06]     | <0.01 |
|                                                                                               | 2016                         | 0.03          | [0.03-0.04]     | <0.01 | 0.03           | [0.03-0.03]     | <0.01 | 0.03                        | [0.03-0.03]     | <0.01 |
| Age (<50 years)                                                                               | 50-59                        | -0.02         | [-0.02-(-0.01)] | <0.01 | -0.03          | [-0.03-(-0.03)] | <0.01 | -0.03                       | [-0.03-(-0.03)] | <0.01 |
|                                                                                               | 60-69                        | 0.02          | [0.02-0.02]     | <0.01 | -0.02          | [-0.02-(-0.02)] | <0.01 | -0.01                       | [-0.01-(-0.01)] | <0.01 |
|                                                                                               | 70-79                        | 0.10          | [0.10-0.10]     | <0.01 | 0.06           | [0.06-0.06]     | <0.01 | 0.07                        | [0.07-0.07]     | <0.01 |
|                                                                                               | 80-84                        | 0.26          | [0.26-0.26]     | <0.01 | 0.20           | [0.20-0.21]     | <0.01 | 0.21                        | [0.21-0.21]     | <0.01 |
|                                                                                               | ≥85                          | 0.41          | [0.41-0.41]     | <0.01 | 0.35           | [0.35-0.35]     | <0.01 | 0.35                        | [0.35-0.35]     | <0.01 |
| Sex (woman)                                                                                   | man                          | -0.06         | [-0.06-(-0.06)] | <0.01 | -0.05          | [-0.05-(-0.05)] | <0.01 | -0.05                       | [-0.05-(-0.05)] | <0.01 |
| BMI, (kg/m <sup>2</sup> )                                                                     |                              | <0.01         | [<0.01-<0.01]   | <0.01 | <0.01          | [<0.01-<0.01]   | <0.01 | <0.01                       | [<0.01-<0.01]   | <0.01 |
| Pre-operative ASA<br>physical function score<br>(Mild disease not<br>incapacitating, grade 2) | Fit and healthy<br>(grade 1) | -0.03         | [-0.03-(-0.03)] | <0.01 | -0.02          | [-0.02-(-0.02)] | <0.01 | -0.01                       | [-0.01-(-0.01)] | <0.01 |

|                                                  |                                                                         |       |                 |       |       |                 |       |       |               |       |
|--------------------------------------------------|-------------------------------------------------------------------------|-------|-----------------|-------|-------|-----------------|-------|-------|---------------|-------|
|                                                  | Incapacitating systemic disease (grade 3)                               | 0.12  | [0.12-0.12]     | <0.01 | 0.11  | [0.11-0.11]     | <0.01 | 0.09  | [0.09-0.09]   | <0.01 |
|                                                  | Life threatening disease or Expected to die within 24h (grades 4 and 5) | 0.23  | [0.23-0.23]     | <0.01 | 0.20  | [0.20-0.20]     | <0.01 | 0.17  | [0.17-0.17]   | <0.01 |
| IMD (Most deprived 20%)                          | Least deprived 20%                                                      | -0.02 | [-0.04-(-0.01)] | <0.01 | -0.02 | [-0.03-(-0.01)] | <0.01 | -0.01 | [-0.02-<0.01] | 0.01  |
|                                                  | Less deprived 20-40%                                                    | -0.01 | [-0.02-<0.01]   | 0.01  | -0.01 | [-0.02-<0.01]   | 0.05  | <0.01 | [-0.01-0.01]  | 0.45  |
|                                                  | Less deprived 40-60%                                                    | <0.01 | [-0.01-0.01]    | 0.35  | <0.01 | [-0.01-0.01]    | 0.58  | <0.01 | [-0.01-0.01]  | 0.73  |
|                                                  | More deprived 20-40%                                                    | <0.01 | [-0.01-0.01]    | 0.74  | <0.01 | [-0.01-0.01]    | 0.91  | <0.01 | [-0.01-0.01]  | 0.99  |
| Rural/Urban indicator (Urban >=10,000 habitants) | Town and fringe                                                         | 0.02  | [0.02-0.02]     | <0.01 | 0.01  | [0.01-0.01]     | <0.01 | 0.01  | [0.01-0.01]   | <0.01 |

|                                                                  |                              |       |                 |       |       |                 |       |       |                 |       |
|------------------------------------------------------------------|------------------------------|-------|-----------------|-------|-------|-----------------|-------|-------|-----------------|-------|
|                                                                  | Village/isolated             | <0.01 | [-0.01-<0.01]   | <0.01 | <0.01 | [-0.01-<0.01]   | <0.01 | <0.01 | [-0.01-<0.01]   | <0.01 |
| Primary indication<br>(Osteoarthritis)                           | Osteoarthritis<br>and Other* | 0.14  | [0.14-0.14]     | <0.01 | 0.11  | [0.11-0.11]     | <0.01 | 0.08  | [0.08-0.08]     | <0.01 |
| Charlson score (None,<br>0)                                      | Mild (1)                     | 0.03  | [0.03-0.03]     | <0.01 | 0.03  | [0.03-0.03]     | <0.01 | 0.02  | [0.02-0.02]     | <0.01 |
|                                                                  | Moderate (2)                 | 0.07  | [0.07-0.07]     | <0.01 | 0.07  | [0.07-0.07]     | <0.01 | 0.05  | [0.05-0.05]     | <0.01 |
|                                                                  | Severe (≥3)                  | 0.11  | [0.11-0.12]     | <0.01 | 0.11  | [0.11-0.11]     | <0.01 | 0.09  | [0.09-0.09]     | <0.01 |
| EQ-5D-3L (Lowest<br>quintile)                                    | 2nd quintile                 | -0.07 | [-0.07-(-0.07)] | <0.01 | -0.07 | [-0.07-(-0.07)] | <0.01 | -0.07 | [-0.07-(-0.07)] | <0.01 |
|                                                                  | 3rd quintile                 | -0.10 | [-0.10-(-0.10)] | <0.01 | -0.09 | [-0.09-(-0.09)] | <0.01 | -0.08 | [-0.08-(-0.08)] | <0.01 |
|                                                                  | 4th quintile                 | -0.11 | [-0.11-(-0.11)] | <0.01 | -0.11 | [-0.11-(-0.11)] | <0.01 | -0.10 | [-0.10-(-0.10)] | <0.01 |
|                                                                  | Highest quintile             | -0.14 | [-0.14-(-0.14)] | <0.01 | -0.13 | [-0.14-(-0.13)] | <0.01 | -0.13 | [-0.13-(-0.13)] | <0.01 |
| <i>Surgical factors</i>                                          |                              |       |                 |       |       |                 |       |       |                 |       |
| Lead surgeon<br>experience<br>(Consultant)                       | Other**                      |       |                 |       | 0.07  | [0.07-0.07]     | <0.01 | 0.01  | [0.01-0.01]     | <0.01 |
| Surgical volume per<br>lead surgeon (>150<br>surgeries per year) | ≤10                          |       |                 |       | 0.08  | [0.08-0.08]     | <0.01 | 0.02  | [0.02-0.02]     | <0.01 |

|                                                            |                 |  |  |  |       |                 |       |       |                 |       |
|------------------------------------------------------------|-----------------|--|--|--|-------|-----------------|-------|-------|-----------------|-------|
|                                                            | 11-50           |  |  |  | 0.06  | [0.06-0.06]     | <0.01 | 0.01  | [0.01-0.01]     | <0.01 |
|                                                            | 51-75           |  |  |  | 0.05  | [0.05-0.06]     | <0.01 | 0.02  | [0.02-0.02]     | <0.01 |
|                                                            | 76-100          |  |  |  | 0.04  | [0.04-0.04]     | <0.01 | 0.01  | [0.01-0.01]     | <0.01 |
|                                                            | 101-150         |  |  |  | 0.02  | [0.02-0.02]     | <0.01 | <0.01 | [<0.01-<0.01]   | <0.01 |
| Surgical volume per unit (Surgeries per year, $\geq 500$ ) | $\leq 200$      |  |  |  | 0.05  | [0.05-0.05]     | <0.01 | 0.08  | [0.08-0.08]     | <0.01 |
|                                                            | 200-299         |  |  |  | 0.01  | [0.01-0.01]     | <0.01 | 0.01  | [0.01-0.01]     | <0.01 |
|                                                            | 300-399         |  |  |  | -0.02 | [-0.02-(-0.02)] | <0.01 | -0.02 | [-0.02-(-0.02)] | <0.01 |
|                                                            | 400-499         |  |  |  | -0.02 | [-0.02-(-0.02)] | <0.01 | -0.02 | [-0.02-(-0.02)] | <0.01 |
| Minimally invasive surgery (No)                            | Yes             |  |  |  | -0.03 | [-0.03-(-0.03)] | <0.01 | -0.02 | [-0.02-(-0.02)] | <0.01 |
| Thromboprophylaxis (LMWH +/-Other)                         | None            |  |  |  | -0.03 | [-0.03-(-0.03)] | <0.01 | -0.01 | [-0.01-<0.01]   | <0.01 |
|                                                            | Aspirin only    |  |  |  | -0.01 | [-0.01-(-0.01)] | <0.01 | -0.01 | [-0.01-<0.01]   | <0.01 |
|                                                            | Other (no LMWH) |  |  |  | -0.01 | [-0.01-<0.01]   | <0.01 | 0.01  | [0.01-0.01]     | <0.01 |
| Mechanical prophylaxis (any)                               | None            |  |  |  | 0.07  | [0.07-0.07]     | <0.01 | 0.02  | [0.02-0.02]     | <0.01 |

|                                            |                         |  |  |  |       |                 |       |       |                 |       |
|--------------------------------------------|-------------------------|--|--|--|-------|-----------------|-------|-------|-----------------|-------|
| General anaesthesia<br>(No)                | Yes                     |  |  |  | 0.04  | [0.04-0.04]     | <0.01 | 0.04  | [0.04-0.04]     | <0.01 |
| Regional – epidural<br>anaesthesia (No)    | Yes                     |  |  |  | 0.03  | [0.03-0.03]     | <0.01 | 0.02  | [0.02-0.02]     | <0.01 |
| Regional – nerve block<br>anaesthesia (No) | Yes                     |  |  |  | 0.04  | [0.03-0.04]     | <0.01 | 0.02  | [0.02-0.02]     | <0.01 |
| Regional – spinal<br>anaesthesia (No)      | Yes                     |  |  |  | -0.01 | [-0.01-(-0.01)] | <0.01 | <0.01 | [<0.01-<0.01]   | <0.01 |
| Type of approach<br>(Medial parapatellar)  | Lateral<br>parapatellar |  |  |  | 0.06  | [0.05-0.06]     | <0.01 | 0.04  | [0.04-0.04]     | <0.01 |
|                                            | Mid-Vastus              |  |  |  | -0.04 | [-0.04-(-0.04)] | <0.01 | -0.05 | [-0.05-(-0.05)] | <0.01 |
|                                            | Sub-Vastus              |  |  |  | -0.05 | [-0.05-(-0.04)] | <0.01 | -0.03 | [-0.03-(-0.03)] | <0.01 |
|                                            | Other                   |  |  |  | 0.02  | [0.02-0.03]     | <0.01 | 0.03  | [0.02-0.03]     | <0.01 |
| Femoral bone graft<br>(No)                 | Yes                     |  |  |  | 0.02  | [0.02-0.02]     | <0.01 | 0.03  | [0.03-0.03]     | <0.01 |
| Tibia bone graft (No)                      | Yes                     |  |  |  | 0.07  | [0.07-0.07]     | <0.01 | 0.06  | [0.06-0.06]     | <0.01 |
| Primary femoral<br>fixation (Cemented)     | Cementless              |  |  |  | 0.03  | [0.03-0.03]     | <0.01 | 0.03  | [0.03-0.04]     | <0.01 |

|                                                                        |                                                 |  |  |  |  |       |                 |       |       |                 |       |
|------------------------------------------------------------------------|-------------------------------------------------|--|--|--|--|-------|-----------------|-------|-------|-----------------|-------|
| Primary Tibial fixation<br>(Cemented)                                  | Cementless                                      |  |  |  |  | -0.02 | [-0.02-(-0.02)] | <0.01 | -0.03 | [-0.03-(-0.03)] | <0.01 |
| Type of knee implant<br>(TKR)                                          | UKR                                             |  |  |  |  | 0.22  | [0.22-0.22]     | <0.01 | 0.22  | [0.22-0.22]     | <0.01 |
| <i>Hospital organisation factors</i>                                   |                                                 |  |  |  |  |       |                 |       |       |                 |       |
| Unit type (Public hospital)                                            | Private hospital                                |  |  |  |  |       |                 |       | -0.19 | [-0.19-(-0.19)] | <0.01 |
|                                                                        | Independent sector (private) – treatment centre |  |  |  |  |       |                 |       | -0.33 | [-0.33-(-0.33)] | <0.01 |
| FTE of speciality groups on trauma and orthopaedic surgery (0-24 FTEs) | 25-29                                           |  |  |  |  |       |                 |       | 0.02  | [0.02-0.02]     | <0.01 |
|                                                                        | 30-39                                           |  |  |  |  |       |                 |       | 0.02  | [0.02-0.02]     | <0.01 |
|                                                                        | 40-49                                           |  |  |  |  |       |                 |       | 0.03  | [0.03-0.03]     | <0.01 |
|                                                                        | >50                                             |  |  |  |  |       |                 |       | 0.04  | [0.04-0.04]     | <0.01 |

|                                        |         |  |  |  |  |  |  |       |                 |       |
|----------------------------------------|---------|--|--|--|--|--|--|-------|-----------------|-------|
| Consultant FTE (0-24 FTEs)             | 25-29   |  |  |  |  |  |  | 0.01  | [0.01-0.01]     | <0.01 |
|                                        | 30-39   |  |  |  |  |  |  | 0.01  | [0.01-0.01]     | <0.01 |
|                                        | 40-49   |  |  |  |  |  |  | 0.01  | [0.01-0.01]     | <0.01 |
|                                        | >50     |  |  |  |  |  |  | 0.03  | [0.03-0.03]     | <0.01 |
| middle grade doctor FTE (0-24 FTEs)    | 25-29   |  |  |  |  |  |  | 0.01  | [0.01-0.01]     | <0.01 |
|                                        | 30-39   |  |  |  |  |  |  | 0.03  | [0.02-0.03]     | <0.01 |
|                                        | 40-49   |  |  |  |  |  |  | 0.03  | [0.03-0.03]     | <0.01 |
|                                        | >50     |  |  |  |  |  |  | 0.05  | [0.04-0.05]     | <0.01 |
| early career doctor FTE (0-24 FTEs)    | 25-29   |  |  |  |  |  |  | <0.01 | [<0.01-<0.01]   | <0.01 |
|                                        | 30-39   |  |  |  |  |  |  | 0.03  | [0.03-0.03]     | <0.01 |
| Total beds available overnight (0-349) | 350-499 |  |  |  |  |  |  | -0.02 | [-0.02-(-0.02)] | <0.01 |
|                                        | 500-699 |  |  |  |  |  |  | -0.04 | [-0.05-(-0.04)] | <0.01 |
|                                        | 700-999 |  |  |  |  |  |  | -0.06 | [-0.06-(-0.06)] | <0.01 |
|                                        | ≥1000   |  |  |  |  |  |  | -0.07 | [-0.07-(-0.07)] | <0.01 |



|                                                                          |       |  |  |  |  |  |  |       |                 |       |
|--------------------------------------------------------------------------|-------|--|--|--|--|--|--|-------|-----------------|-------|
| Total beds available overnight for trauma and orthopaedic surgery (0-34) | 35-49 |  |  |  |  |  |  | 0.01  | [0.01-0.01]     | <0.01 |
|                                                                          | 50-69 |  |  |  |  |  |  | 0.02  | [0.02-0.02]     | <0.01 |
|                                                                          | 70-99 |  |  |  |  |  |  | 0.03  | [0.03-0.03]     | <0.01 |
|                                                                          | ≥100  |  |  |  |  |  |  | 0.04  | [0.04-0.04]     | <0.01 |
| Total beds available overnight for rehabilitation (0)                    | >0-10 |  |  |  |  |  |  | <0.01 | [<0.01-<0.01]   | <0.01 |
|                                                                          | 11-20 |  |  |  |  |  |  | <0.01 | [<0.01-<0.01]   | <0.01 |
|                                                                          | ≥20   |  |  |  |  |  |  | 0.02  | [0.02-0.02]     | <0.01 |
| Operating theatres (<10)                                                 | 10-14 |  |  |  |  |  |  | -0.01 | [-0.01-(-0.01)] | <0.01 |
|                                                                          | 15-19 |  |  |  |  |  |  | -0.01 | [-0.01-(-0.01)] | <0.01 |
|                                                                          | 20-24 |  |  |  |  |  |  | -0.03 | [-0.03-(-0.03)] | <0.01 |
|                                                                          | ≥25   |  |  |  |  |  |  | -0.05 | [-0.05-(-0.05)] | <0.01 |
| Dedicated day case operating theatres (≥7)                               | 0     |  |  |  |  |  |  | <0.01 | [<0.01-<0.01]   | <0.01 |

|  |     |  |  |  |  |  |  |       |               |       |
|--|-----|--|--|--|--|--|--|-------|---------------|-------|
|  | 1-2 |  |  |  |  |  |  | <0.01 | [<0.01-<0.01] | <0.01 |
|  | 3-4 |  |  |  |  |  |  | <0.01 | [<0.01-<0.01] | <0.01 |
|  | 5-6 |  |  |  |  |  |  | 0.02  | [0.02-0.02]   | <0.01 |

Total knee replacement, TKR; Unicompartmental knee replacement, UKR; American Society of Anesthesiologists, ASA; Index of multiple deprivation, IMD; European Quality of life-five domain, EQ-5D-3L; low-molecular-weight heparin, LMWH; full time equivalent, FTE (proportion of full time contracted hours).

**eTable 7.** Continuous Multilevel Models of Oxford Hip Score for Patients Who Underwent Planned Primary Hip Replacement

|                                                                                               | Categories                   | Patient model |               |       | Surgical model |               |       | Hospital organisation model |               |       |
|-----------------------------------------------------------------------------------------------|------------------------------|---------------|---------------|-------|----------------|---------------|-------|-----------------------------|---------------|-------|
|                                                                                               |                              | Coef.         | 95% CI        | P     | Coef.          | 95% CI        | P     | Coef.                       | 95% CI        | P     |
| <i>Intercept</i>                                                                              |                              | 35.1          | [34.3-35.8]   | <0.01 | 36.3           | [35.4-37.1]   | <0.01 | 35.9                        | [35.1-36.8]   | <0.01 |
| <i>Patient factors</i>                                                                        |                              |               |               |       |                |               |       |                             |               |       |
| Calendar year (2016)                                                                          | 2015                         | -0.4          | [-0.5-(-0.2)] | <0.01 | -0.2           | [-0.4-(-0.1)] | 0.01  | -0.2                        | [-0.4-(-0.1)] | 0.01  |
|                                                                                               | 2016                         | -0.1          | [-0.3-0.1]    | 0.23  | 0.0            | [-0.2-0.1]    | 0.65  | 0.0                         | [-0.2-0.1]    | 0.67  |
| Age (<50 years)                                                                               | 50-59                        | 0.5           | [0.2-0.9]     | <0.01 | 0.6            | [0.3-1.0]     | <0.01 | 0.6                         | [0.3-0.9]     | <0.01 |
|                                                                                               | 60-69                        | 0.8           | [0.5-1.1]     | <0.01 | 1.1            | [0.7-1.4]     | <0.01 | 1.0                         | [0.7-1.3]     | <0.01 |
|                                                                                               | 70-79                        | <0.1          | [-0.4-0.3]    | 0.82  | 0.4            | [0.1-0.8]     | 0.01  | 0.4                         | [0.1-0.7]     | 0.02  |
|                                                                                               | 80-84                        | -1.0          | [-1.3-(-0.6)] | <0.01 | -0.4           | [-0.7-0.0]    | 0.05  | -0.4                        | [-0.8-<0.1]   | 0.03  |
|                                                                                               | ≥85                          | -1.6          | [-2.0-(-1.2)] | <0.01 | -1.0           | [-1.4-(-0.5)] | <0.01 | -1.0                        | [-1.4-(-0.6)] | <0.01 |
| Sex (woman)                                                                                   | man                          | 0.5           | [0.1-0.8]     | 0.01  | 0.4            | [<0.1-0.8]    | 0.03  | 0.4                         | [<0.1-0.7]    | 0.04  |
| BMI, (kg/m <sup>2</sup> )                                                                     |                              | -0.1          | [-0.1-(-0.1)] | <0.01 | -0.1           | [-0.1-(-0.1)] | <0.01 | -0.1                        | [-0.1-(-0.1)] | <0.01 |
| Pre-operative ASA<br>physical function score<br>(Mild disease not<br>incapacitating, grade 2) | Fit and healthy<br>(grade 1) | 1.0           | [0.8-1.2]     | <0.01 | 1.0            | [0.8-1.1]     | <0.01 | 0.9                         | [0.8-1.1]     | <0.01 |

|                                                  |                                                                         |      |               |       |      |               |       |      |               |       |
|--------------------------------------------------|-------------------------------------------------------------------------|------|---------------|-------|------|---------------|-------|------|---------------|-------|
|                                                  | Incapacitating systemic disease (grade 3)                               | -1.6 | [-1.8-(-1.4)] | <0.01 | -1.5 | [-1.7-(-1.4)] | <0.01 | -1.4 | [-1.6-(-1.3)] | <0.01 |
|                                                  | Life threatening disease or Expected to die within 24h (grades 4 and 5) | -2.6 | [-3.6-(-1.5)] | <0.01 | -2.5 | [-3.6-(-1.5)] | <0.01 | -2.4 | [-3.4-(-1.3)] | <0.01 |
| IMD (Most deprived 20%)                          | Least deprived 20%                                                      | 1.6  | [1.4-1.8]     | <0.01 | 1.5  | [1.3-1.7]     | <0.01 | 1.5  | [1.3-1.7]     | <0.01 |
|                                                  | Less deprived 20-40%                                                    | 1.3  | [1.1-1.5]     | <0.01 | 1.2  | [1.0-1.4]     | <0.01 | 1.2  | [1.0-1.4]     | <0.01 |
|                                                  | Less deprived 40-60%                                                    | 0.6  | [0.4-0.8]     | <0.01 | 0.6  | [0.4-0.8]     | <0.01 | 0.6  | [0.4-0.8]     | <0.01 |
|                                                  | More deprived 20-40%                                                    | 0.2  | [<0.1-0.4]    | 0.03  | 0.2  | [<0.1-0.5]    | 0.03  | 0.2  | [<0.1-0.5]    | 0.02  |
| Rural/Urban indicator (Urban >=10,000 habitants) | Town and fringe                                                         | 0.4  | [0.2-0.6]     | <0.01 | 0.4  | [0.2-0.6]     | <0.01 | 0.4  | [0.2-0.6]     | <0.01 |

|                                        |                              |      |               |       |      |               |       |      |               |       |
|----------------------------------------|------------------------------|------|---------------|-------|------|---------------|-------|------|---------------|-------|
|                                        | Village/isolated             | 0.8  | [0.6-0.9]     | <0.01 | 0.8  | [0.6-0.9]     | <0.01 | 0.7  | [0.5-0.9]     | <0.01 |
| Primary indication<br>(Osteoarthritis) | Osteoarthritis<br>and Other* |      |               |       |      |               |       |      |               |       |
| Charlson score (None,<br>0)            | Mild (1)                     | -1.0 | [-1.1-(-0.8)] | <0.01 | -1.0 | [-1.1-(-0.8)] | <0.01 | -0.9 | [-1.1-(-0.8)] | <0.01 |
|                                        | Moderate (2)                 | -1.2 | [-1.4-(-0.9)] | <0.01 | -1.1 | [-1.4-(-0.9)] | <0.01 | -1.1 | [-1.3-(-0.8)] | <0.01 |
|                                        | Severe (≥3)                  | -1.1 | [-1.5-(-0.8)] | <0.01 | -1.1 | [-1.4-(-0.8)] | <0.01 | -1.0 | [-1.4-(-0.7)] | <0.01 |
| OHS baseline (points)                  |                              | -0.8 | [-0.8-(-0.8)] | <0.01 | -0.8 | [-0.8-(-0.8)] | <0.01 | -0.8 | [-0.8-(-0.8)] | <0.01 |
| EQ-5D-3L (Highest<br>quintile)         | Lowest quintile              | 2.3  | [2.0-2.5]     | <0.01 | 2.3  | [2.0-2.5]     | <0.01 | 2.3  | [2.0-2.5]     | <0.01 |
|                                        | 2nd quintile                 | 3.3  | [3.1-3.6]     | <0.01 | 3.3  | [3.0-3.6]     | <0.01 | 3.3  | [3.0-3.5]     | <0.01 |
|                                        | 3rd quintile                 | 3.2  | [2.9-3.5]     | <0.01 | 3.2  | [2.9-3.5]     | <0.01 | 3.2  | [2.9-3.4]     | <0.01 |
|                                        | 4th quintile                 | 3.9  | [3.6-4.2]     | <0.01 | 3.9  | [3.6-4.2]     | <0.01 | 3.9  | [3.6-4.2]     | <0.01 |
| Woman x EQ-5D-3L<br>(Highest quintile) | Woman x<br>Lowest quintile   | 0.9  | [0.5-1.3]     | <0.01 | 0.9  | [0.5-1.3]     | <0.01 | 0.9  | [0.5-1.4]     | <0.01 |
|                                        | Woman x 2nd<br>quintile      | 0.3  | [-0.1-0.7]    | 0.17  | 0.3  | [-0.1-0.7]    | 0.16  | 0.3  | [-0.1-0.8]    | 0.13  |
|                                        | Woman x 3rd<br>quintile      | 0.7  | [0.3-1.1]     | <0.01 | 0.7  | [0.3-1.1]     | <0.01 | 0.7  | [0.3-1.2]     | <0.01 |

|                                                            |                      |     |           |      |      |               |       |      |               |       |
|------------------------------------------------------------|----------------------|-----|-----------|------|------|---------------|-------|------|---------------|-------|
|                                                            | Woman x 4th quintile | 0.5 | [0.1-0.9] | 0.03 | 0.5  | [0.1-0.9]     | 0.03  | 0.5  | [0.1-0.9]     | 0.02  |
| <i>Surgical factors</i>                                    |                      |     |           |      |      |               |       |      |               |       |
| Lead surgeon experience (Consultant)                       | Other**              |     |           |      | -0.6 | [-0.7-(-0.4)] | <0.01 | -0.3 | [-0.4-(-0.1)] | <0.01 |
| Surgical volume per lead surgeon (>150 surgeries per year) | ≤10                  |     |           |      | -1.2 | [-1.6-(-0.8)] | <0.01 | -1.0 | [-1.5-(-0.6)] | <0.01 |
|                                                            | 11-50                |     |           |      | -0.7 | [-0.9-(-0.5)] | <0.01 | -0.6 | [-0.8-(-0.4)] | <0.01 |
|                                                            | 51-75                |     |           |      | -0.5 | [-0.7-(-0.4)] | <0.01 | -0.5 | [-0.7-(-0.3)] | <0.01 |
|                                                            | 76-100               |     |           |      | -0.5 | [-0.7-(-0.3)] | <0.01 | -0.4 | [-0.6-(-0.2)] | <0.01 |
|                                                            | 101-150              |     |           |      | -0.3 | [-0.5-(-0.1)] | <0.01 | -0.3 | [-0.5-(-0.1)] | <0.01 |
| Surgical volume per unit (Surgeries per year, ≥500)        | ≤200                 |     |           |      | -0.2 | [-0.4-<0.1]   | 0.13  |      |               |       |
|                                                            | 200-299              |     |           |      | -0.2 | [-0.4-<0.1]   | 0.04  |      |               |       |
|                                                            | 300-399              |     |           |      | -0.1 | [-0.3-0.1]    | 0.16  |      |               |       |
|                                                            | 400-499              |     |           |      | 0.1  | [-0.2-0.4]    | 0.53  |      |               |       |

|                                         |                           |  |  |  |      |               |       |      |               |       |
|-----------------------------------------|---------------------------|--|--|--|------|---------------|-------|------|---------------|-------|
| Minimally invasive surgery (No)         | Yes                       |  |  |  |      |               |       |      |               |       |
| Thromboprophylaxis (LMWH +/-Other)      | None                      |  |  |  |      |               |       |      |               |       |
|                                         | Aspirin only              |  |  |  |      |               |       |      |               |       |
|                                         | Other (no LMWH)           |  |  |  |      |               |       |      |               |       |
| Mechanical prophylaxis (any)            | None                      |  |  |  |      |               |       |      |               |       |
| General anaesthesia (No)                | Yes                       |  |  |  | -0.3 | [-0.4-(-0.1)] | <0.01 | -0.3 | [-0.5-(-0.1)] | <0.01 |
| Regional – epidural anaesthesia (No)    | Yes                       |  |  |  |      |               |       |      |               |       |
| Regional – nerve block anaesthesia (No) | Yes                       |  |  |  |      |               |       |      |               |       |
| Regional – spinal anaesthesia (No)      | Yes                       |  |  |  | 0.4  | [0.2-0.5]     | <0.01 | 0.3  | [0.2-0.5]     | <0.01 |
| Type of approach (Posterior)            | Anterior, antero-lateral, |  |  |  | -0.9 | [-1.0-(-0.8)] | <0.01 | -0.9 | [-1.0-(-0.7)] | <0.01 |

|                                                         |                                                              |  |  |  |      |               |       |      |               |       |
|---------------------------------------------------------|--------------------------------------------------------------|--|--|--|------|---------------|-------|------|---------------|-------|
|                                                         | hardinge,<br>lateral,<br>trochanteric<br>osteotomy,<br>other |  |  |  |      |               |       |      |               |       |
| Femoral bone graft<br>(No)                              | Yes                                                          |  |  |  | -0.8 | [-1.6-(-0.1)] | 0.03  | -0.8 | [-1.5-<0.1]   | 0.05  |
| Cup bone graft (No)                                     | Yes                                                          |  |  |  | 0.5  | [0.2-0.8]     | <0.01 | 0.5  | [0.2-0.8]     | <0.01 |
| Primary cup fixation<br>(Cementless)                    | Cemented                                                     |  |  |  | -0.6 | [-0.8-(-0.5)] | <0.01 | -0.6 | [-0.7-(-0.4)] | <0.01 |
| Type of primary stem<br>fixation (Cemented<br>THR stem) | Not available or<br>Resurfacing                              |  |  |  | <0.1 | [-0.8-0.9]    | 0.91  |      |               |       |
|                                                         | Cementless<br>THR stem                                       |  |  |  | <0.1 | [-0.1-0.1]    | 0.94  |      |               |       |
| Bearing surface (MoP)                                   | MoM                                                          |  |  |  | -1.7 | [-3.9-0.4]    | 0.11  | -1.6 | [-3.6-0.3]    | 0.10  |
|                                                         | CoC                                                          |  |  |  | 0.2  | [<0.1-0.5]    | 0.03  | 0.3  | [0.1-0.6]     | <0.01 |
|                                                         | CoP                                                          |  |  |  | 0.2  | [0.1-0.4]     | <0.01 | 0.3  | [0.1-0.4]     | <0.01 |



|                                                                        |                                                 |  |  |  |      |            |      |      |            |       |
|------------------------------------------------------------------------|-------------------------------------------------|--|--|--|------|------------|------|------|------------|-------|
|                                                                        | CoM or MoC or unknown                           |  |  |  | -0.5 | [-1.1-0.1] | 0.07 | -0.4 | [-1.0-0.2] | 0.20  |
| Femoral head size (≤28mm)                                              | 32                                              |  |  |  | 0.1  | [-0.1-0.2] | 0.45 | 0.1  | [-0.1-0.2] | 0.32  |
|                                                                        | 36-42                                           |  |  |  | <0.1 | [-0.2-0.2] | 0.91 | <0.1 | [-0.2-0.2] | 0.64  |
|                                                                        | ≥44                                             |  |  |  | 2.0  | [0.2-3.8]  | 0.03 | 2.1  | [0.3-3.9]  | 0.02  |
| <i>Hospital organisation factors</i>                                   |                                                 |  |  |  |      |            |      |      |            |       |
| Unit type (Public hospital)                                            | Private hospital                                |  |  |  |      |            |      | 0.8  | [0.6-0.9]  | <0.01 |
|                                                                        | Independent sector (private) – treatment centre |  |  |  |      |            |      | 1.0  | [0.7-1.3]  | <0.01 |
| FTE of speciality groups on trauma and orthopaedic surgery (0-24 FTEs) | 25-29                                           |  |  |  |      |            |      |      |            |       |
|                                                                        | 30-39                                           |  |  |  |      |            |      |      |            |       |

|                                        |         |  |  |  |  |  |  |      |               |       |
|----------------------------------------|---------|--|--|--|--|--|--|------|---------------|-------|
|                                        | 40-49   |  |  |  |  |  |  |      |               |       |
|                                        | >50     |  |  |  |  |  |  |      |               |       |
| Consultant FTE (0-24 FTEs)             | 25-29   |  |  |  |  |  |  |      |               |       |
|                                        | 30-39   |  |  |  |  |  |  |      |               |       |
|                                        | 40-49   |  |  |  |  |  |  |      |               |       |
|                                        | >50     |  |  |  |  |  |  |      |               |       |
| middle grade doctor FTE (0-24 FTEs)    | 25-29   |  |  |  |  |  |  |      |               |       |
|                                        | 30-39   |  |  |  |  |  |  |      |               |       |
|                                        | 40-49   |  |  |  |  |  |  |      |               |       |
|                                        | >50     |  |  |  |  |  |  |      |               |       |
| early career doctor FTE (0-24 FTEs)    | 25-29   |  |  |  |  |  |  |      |               |       |
|                                        | 30-39   |  |  |  |  |  |  |      |               |       |
| Total beds available overnight (0-349) | 350-499 |  |  |  |  |  |  | -0.5 | [-0.8-(-0.2)] | <0.01 |
|                                        | 500-699 |  |  |  |  |  |  | -0.7 | [-1.0-(-0.4)] | <0.01 |
|                                        | 700-999 |  |  |  |  |  |  | -0.7 | [-1.0-(-0.4)] | <0.01 |

|                                                                                   |       |  |  |  |  |  |  |  |      |               |       |
|-----------------------------------------------------------------------------------|-------|--|--|--|--|--|--|--|------|---------------|-------|
|                                                                                   | ≥1000 |  |  |  |  |  |  |  | -0.8 | [-1.1-(-0.4)] | <0.01 |
| Total beds available<br>overnight for trauma<br>and orthopaedic<br>surgery (0-34) | 35-49 |  |  |  |  |  |  |  |      |               |       |
|                                                                                   | 50-69 |  |  |  |  |  |  |  |      |               |       |
|                                                                                   | 70-99 |  |  |  |  |  |  |  |      |               |       |
|                                                                                   | ≥100  |  |  |  |  |  |  |  |      |               |       |
| Total beds available<br>overnight for<br>rehabilitation (0)                       | >0-10 |  |  |  |  |  |  |  |      |               |       |
|                                                                                   | 11-20 |  |  |  |  |  |  |  |      |               |       |
|                                                                                   | ≥20   |  |  |  |  |  |  |  |      |               |       |
| Operating theatres<br>(<10)                                                       | 10-14 |  |  |  |  |  |  |  | 0.4  | [0.1-0.7]     | 0.02  |
|                                                                                   | 15-19 |  |  |  |  |  |  |  | 0.7  | [0.3-1.0]     | <0.01 |
|                                                                                   | 20-24 |  |  |  |  |  |  |  | 0.6  | [0.3-1.0]     | <0.01 |
|                                                                                   | ≥25   |  |  |  |  |  |  |  | 0.6  | [0.2-1.0]     | <0.01 |

|                                                    |     |  |  |  |  |  |  |  |      |             |      |
|----------------------------------------------------|-----|--|--|--|--|--|--|--|------|-------------|------|
| Dedicated day case operating theatres ( $\geq 7$ ) | 0   |  |  |  |  |  |  |  | -0.2 | [-0.4-<0.1] | 0.12 |
|                                                    | 1-2 |  |  |  |  |  |  |  | -0.3 | [-0.5-<0.1] | 0.02 |
|                                                    | 3-4 |  |  |  |  |  |  |  | <0.1 | [-0.2-0.2]  | 0.89 |
|                                                    | 5-6 |  |  |  |  |  |  |  | -0.1 | [-0.3-0.1]  | 0.19 |

American Society of Anesthesiologists, ASA; Index of multiple deprivation, IMD; European Quality of life-five domain, EQ-5D-3L; low-molecular-weight heparin, LMWH; total hip replacement, THR; metal-on-metal, MoM; metal-on-polyethylene, MoP; ceramic-on-ceramic, CoC; ceramic-on-polyethylene, CoP; ceramic-on-metal, CoM; metal-on-ceramic, MoC; full time equivalent, FTE (proportion of full time contracted hours).

**eTable 8.** Continuous Multilevel Models of Oxford Knee Score for Patients Who Underwent Planned Primary TKR/UKR

|                                                                                               | Categories                   | Patient model |                 |       | Surgical model |                 |       | Hospital organisation model |                 |       |
|-----------------------------------------------------------------------------------------------|------------------------------|---------------|-----------------|-------|----------------|-----------------|-------|-----------------------------|-----------------|-------|
|                                                                                               |                              | Coef.         | 95% CI          | P     | Coef.          | 95% CI          | P     | Coef.                       | 95% CI          | P     |
| <i>Intercept</i>                                                                              |                              | 25.62         | [24.89-26.35]   | <0.01 | 25.96          | [25.18-26.73]   | <0.01 | 25.61                       | [24.84-26.38]   | <0.01 |
| <i>Patient factors</i>                                                                        |                              |               |                 |       |                |                 |       |                             |                 |       |
| Calendar year (2016)                                                                          | 2015                         | -0.74         | [-0.90-(-0.58)] | <0.01 | -0.71          | [-0.87-(-0.55)] | <0.01 | -0.69                       | [-0.85-(-0.53)] | <0.01 |
|                                                                                               | 2016                         | -0.56         | [-0.72-(-0.40)] | <0.01 | -0.57          | [-0.73-(-0.41)] | <0.01 | -0.56                       | [-0.72-(-0.40)] | <0.01 |
| Age (<50 years)                                                                               | 50-59                        | 1.30          | [0.76-1.85]     | <0.01 | 1.30           | [0.76-1.85]     | <0.01 | 1.26                        | [0.71-1.81]     | <0.01 |
|                                                                                               | 60-69                        | 2.57          | [2.04-3.10]     | <0.01 | 2.56           | [2.03-3.09]     | <0.01 | 2.51                        | [1.98-3.03]     | <0.01 |
|                                                                                               | 70-79                        | 2.92          | [2.39-3.45]     | <0.01 | 2.92           | [2.39-3.45]     | <0.01 | 2.86                        | [2.33-3.39]     | <0.01 |
|                                                                                               | 80-84                        | 2.54          | [1.99-3.09]     | <0.01 | 2.53           | [1.98-3.08]     | <0.01 | 2.48                        | [1.93-3.03]     | <0.01 |
|                                                                                               | ≥85                          | 2.23          | [1.64-2.82]     | <0.01 | 2.21           | [1.62-2.80]     | <0.01 | 2.18                        | [1.59-2.77]     | <0.01 |
| Sex (woman)                                                                                   | man                          | 0.38          | [0.27-0.50]     | <0.01 | 0.38           | [0.26-0.49]     | <0.01 | 0.38                        | [0.27-0.50]     | <0.01 |
| BMI, (kg/m <sup>2</sup> )                                                                     |                              | -0.08         | [-0.09-(-0.07)] | <0.01 | -0.08          | [-0.09-(-0.07)] | <0.01 | -0.07                       | [-0.08-(-0.06)] | <0.01 |
| Pre-operative ASA<br>physical function score<br>(Mild disease not<br>incapacitating, grade 2) | Fit and healthy<br>(grade 1) | 0.80          | [0.60-1.01]     | <0.01 | 0.81           | [0.60-1.01]     | <0.01 | 0.77                        | [0.57-0.98]     | <0.01 |

|                                                  |                                                                         |       |                 |       |       |                 |       |       |                 |       |
|--------------------------------------------------|-------------------------------------------------------------------------|-------|-----------------|-------|-------|-----------------|-------|-------|-----------------|-------|
|                                                  | Incapacitating systemic disease (grade 3)                               | -1.16 | [-1.32-(-1.00)] | <0.01 | -1.13 | [-1.29-(-0.97)] | <0.01 | -1.05 | [-1.21-(-0.90)] | <0.01 |
|                                                  | Life threatening disease or Expected to die within 24h (grades 4 and 5) | -3.11 | [-4.36-(-1.86)] | <0.01 | -3.07 | [-4.32-(-1.82)] | <0.01 | -2.94 | [-4.19-(-1.69)] | <0.01 |
| IMD (Most deprived 20%)                          | Least deprived 20%                                                      | 1.31  | [1.10-1.52]     | <0.01 | 1.30  | [1.09-1.50]     | <0.01 | 1.28  | [1.07-1.49]     | <0.01 |
|                                                  | Less deprived 20-40%                                                    | 1.08  | [0.89-1.28]     | <0.01 | 1.07  | [0.87-1.26]     | <0.01 | 1.05  | [0.85-1.25]     | <0.01 |
|                                                  | Less deprived 40-60%                                                    | 0.45  | [0.25-0.65]     | <0.01 | 0.44  | [0.23-0.64]     | <0.01 | 0.44  | [0.23-0.64]     | <0.01 |
|                                                  | More deprived 20-40%                                                    | 0.27  | [0.07-0.48]     | 0.01  | 0.26  | [0.06-0.47]     | 0.01  | 0.27  | [0.06-0.47]     | 0.01  |
| Rural/Urban indicator (Urban >=10,000 habitants) | Town and fringe                                                         | 0.47  | [0.28-0.67]     | <0.01 | 0.48  | [0.29-0.68]     | <0.01 | 0.48  | [0.28-0.67]     | <0.01 |

|                                            |                              |       |                 |       |       |                 |       |       |                 |       |
|--------------------------------------------|------------------------------|-------|-----------------|-------|-------|-----------------|-------|-------|-----------------|-------|
|                                            | Village/isolated             | 0.84  | [0.65-1.03]     | <0.01 | 0.85  | [0.66-1.04]     | <0.01 | 0.83  | [0.64-1.02]     | <0.01 |
| Primary indication<br>(Osteoarthritis)     | Osteoarthritis<br>and Other* |       |                 |       |       |                 |       |       |                 |       |
| Charlson score (None,<br>0)                | Mild (1)                     | -1.01 | [-1.15-(-0.88)] | <0.01 | -1.02 | [-1.15-(-0.88)] | <0.01 | -1.00 | [-1.13-(-0.86)] | <0.01 |
|                                            | Moderate (2)                 | -0.97 | [-1.19-(-0.75)] | <0.01 | -0.96 | [-1.18-(-0.74)] | <0.01 | -0.91 | [-1.13-(-0.69)] | <0.01 |
|                                            | Severe (≥3)                  | -1.28 | [-1.59-(-0.97)] | <0.01 | -1.27 | [-1.58-(-0.96)] | <0.01 | -1.22 | [-1.53-(-0.91)] | <0.01 |
| OKS baseline (points)                      |                              | -0.67 | [-0.68-(-0.66)] | <0.01 | -0.68 | [-0.69-(-0.67)] | <0.01 | -0.68 | [-0.69-(-0.67)] | <0.01 |
| EQ-5D-3L (Lowest<br>quintile)              | 2nd quintile                 | 2.68  | [2.48-2.88]     | <0.01 | 2.67  | [2.47-2.87]     | <0.01 | 2.66  | [2.46-2.86]     | <0.01 |
|                                            | 3rd quintile                 | 3.06  | [2.88-3.25]     | <0.01 | 3.04  | [2.86-3.23]     | <0.01 | 3.02  | [2.84-3.21]     | <0.01 |
|                                            | 4th quintile                 | 2.43  | [2.19-2.68]     | <0.01 | 2.42  | [2.17-2.66]     | <0.01 | 2.40  | [2.15-2.64]     | <0.01 |
|                                            | Highest quintile             | 3.81  | [3.60-4.01]     | <0.01 | 3.78  | [3.57-3.99]     | <0.01 | 3.77  | [3.56-3.98]     | <0.01 |
| <i>Surgical factors</i>                    |                              |       |                 |       |       |                 |       |       |                 |       |
| Lead surgeon<br>experience<br>(Consultant) | Other**                      |       |                 |       | -0.49 | [-0.63-(-0.34)] | <0.01 | -0.28 | [-0.43-(-0.12)] | <0.01 |

|                                                            |              |  |  |  |  |       |                 |       |       |                 |       |
|------------------------------------------------------------|--------------|--|--|--|--|-------|-----------------|-------|-------|-----------------|-------|
| Surgical volume per lead surgeon (>150 surgeries per year) | ≤10          |  |  |  |  | -0.54 | [-1.01-(-0.06)] | 0.03  |       |                 |       |
|                                                            | 11-50        |  |  |  |  | -0.33 | [-0.52-(-0.13)] | <0.01 |       |                 |       |
|                                                            | 51-75        |  |  |  |  | -0.23 | [-0.43-(-0.03)] | 0.03  |       |                 |       |
|                                                            | 76-100       |  |  |  |  | -0.08 | [-0.27-0.12]    | 0.43  |       |                 |       |
|                                                            | 101-150      |  |  |  |  | -0.16 | [-0.35-0.03]    | 0.10  |       |                 |       |
| Surgical volume per unit (Surgeries per year, ≥500)        | ≤200         |  |  |  |  | -0.19 | [-0.42-0.03]    | 0.10  | -0.43 | [-0.66-(-0.20)] | <0.01 |
|                                                            | 200-299      |  |  |  |  | -0.20 | [-0.40-0.01]    | 0.06  | -0.29 | [-0.50-(-0.08)] | 0.01  |
|                                                            | 300-399      |  |  |  |  | -0.04 | [-0.23-0.16]    | 0.71  | -0.08 | [-0.28-0.11]    | 0.40  |
|                                                            | 400-499      |  |  |  |  | -0.37 | [-0.59-(-0.15)] | <0.01 | -0.40 | [-0.62-(-0.19)] | <0.01 |
| Minimally invasive surgery (No)                            | Yes          |  |  |  |  |       |                 |       |       |                 |       |
| Thromboprophylaxis (LMWH +/-Other)                         | None         |  |  |  |  |       |                 |       |       |                 |       |
|                                                            | Aspirin only |  |  |  |  |       |                 |       |       |                 |       |



|                                         |                      |  |  |  |       |                 |       |       |                 |       |
|-----------------------------------------|----------------------|--|--|--|-------|-----------------|-------|-------|-----------------|-------|
|                                         | Other (no LMWH)      |  |  |  |       |                 |       |       |                 |       |
| Mechanical prophylaxis (any)            | None                 |  |  |  | -0.37 | [-0.71-(-0.03)] | 0.04  |       |                 |       |
| General anaesthesia (No)                | Yes                  |  |  |  | -0.41 | [-0.59-(-0.23)] | <0.01 | -0.46 | [-0.64-(-0.28)] | <0.01 |
| Regional – epidural anaesthesia (No)    | Yes                  |  |  |  |       |                 |       |       |                 |       |
| Regional – nerve block anaesthesia (No) | Yes                  |  |  |  |       |                 |       |       |                 |       |
| Regional – spinal anaesthesia (No)      | Yes                  |  |  |  | 0.29  | [0.10-0.48]     | <0.01 | 0.25  | [0.07-0.44]     | 0.01  |
| Type of approach (Medial parapatellar)  | Lateral parapatellar |  |  |  | 0.40  | [-0.23-1.02]    | 0.21  | 0.45  | [-0.17-1.08]    | 0.16  |
|                                         | Mid-Vastus           |  |  |  | 0.17  | [-0.18-0.52]    | 0.34  | 0.20  | [-0.15-0.56]    | 0.26  |
|                                         | Sub-Vastus           |  |  |  | 0.67  | [0.11-1.24]     | 0.02  | 0.63  | [0.07-1.19]     | 0.03  |
|                                         | Other                |  |  |  | -0.10 | [-0.59-0.39]    | 0.70  | -0.10 | [-0.59-0.39]    | 0.70  |
| Femoral bone graft (No)                 | Yes                  |  |  |  |       |                 |       |       |                 |       |

|                                                                        |                                                 |  |  |  |  |  |  |      |             |       |
|------------------------------------------------------------------------|-------------------------------------------------|--|--|--|--|--|--|------|-------------|-------|
| Tibia bone graft (No)                                                  | Yes                                             |  |  |  |  |  |  |      |             |       |
| Primary femoral fixation (Cemented)                                    | Cementless                                      |  |  |  |  |  |  |      |             |       |
| Primary Tibial fixation (Cemented)                                     | Cementless                                      |  |  |  |  |  |  |      |             |       |
| Type of knee implant (TKR)                                             | UKR                                             |  |  |  |  |  |  |      |             |       |
| <i>Hospital organisation factors</i>                                   |                                                 |  |  |  |  |  |  |      |             |       |
| Unit type (Public hospital)                                            | Private hospital                                |  |  |  |  |  |  | 0.73 | [0.57-0.88] | <0.01 |
|                                                                        | Independent sector (private) – treatment centre |  |  |  |  |  |  | 0.57 | [0.28-0.85] | <0.01 |
| FTE of speciality groups on trauma and orthopaedic surgery (0-24 FTEs) | 25-29                                           |  |  |  |  |  |  |      |             |       |

|                                        |         |  |  |  |  |  |  |  |  |  |
|----------------------------------------|---------|--|--|--|--|--|--|--|--|--|
|                                        | 30-39   |  |  |  |  |  |  |  |  |  |
|                                        | 40-49   |  |  |  |  |  |  |  |  |  |
|                                        | >50     |  |  |  |  |  |  |  |  |  |
| Consultant FTE (0-24 FTEs)             | 25-29   |  |  |  |  |  |  |  |  |  |
|                                        | 30-39   |  |  |  |  |  |  |  |  |  |
|                                        | 40-49   |  |  |  |  |  |  |  |  |  |
|                                        | >50     |  |  |  |  |  |  |  |  |  |
| middle grade doctor FTE (0-24 FTEs)    | 25-29   |  |  |  |  |  |  |  |  |  |
|                                        | 30-39   |  |  |  |  |  |  |  |  |  |
|                                        | 40-49   |  |  |  |  |  |  |  |  |  |
|                                        | >50     |  |  |  |  |  |  |  |  |  |
| early career doctor FTE (0-24 FTEs)    | 25-29   |  |  |  |  |  |  |  |  |  |
|                                        | 30-39   |  |  |  |  |  |  |  |  |  |
| Total beds available overnight (0-349) | 350-499 |  |  |  |  |  |  |  |  |  |
|                                        | 500-699 |  |  |  |  |  |  |  |  |  |

|                                                                                   |         |  |  |  |  |  |  |  |  |  |
|-----------------------------------------------------------------------------------|---------|--|--|--|--|--|--|--|--|--|
|                                                                                   | 700-999 |  |  |  |  |  |  |  |  |  |
|                                                                                   | ≥1000   |  |  |  |  |  |  |  |  |  |
| Total beds available<br>overnight for trauma<br>and orthopaedic<br>surgery (0-34) | 35-49   |  |  |  |  |  |  |  |  |  |
|                                                                                   | 50-69   |  |  |  |  |  |  |  |  |  |
|                                                                                   | 70-99   |  |  |  |  |  |  |  |  |  |
|                                                                                   | ≥100    |  |  |  |  |  |  |  |  |  |
| Total beds available<br>overnight for<br>rehabilitation (0)                       | >0-10   |  |  |  |  |  |  |  |  |  |
|                                                                                   | 11-20   |  |  |  |  |  |  |  |  |  |
|                                                                                   | ≥20     |  |  |  |  |  |  |  |  |  |
| Operating theatres<br>(<10)                                                       | 10-14   |  |  |  |  |  |  |  |  |  |
|                                                                                   | 15-19   |  |  |  |  |  |  |  |  |  |
|                                                                                   | 20-24   |  |  |  |  |  |  |  |  |  |
|                                                                                   | ≥25     |  |  |  |  |  |  |  |  |  |

|                                                       |     |  |  |  |  |  |  |  |  |  |
|-------------------------------------------------------|-----|--|--|--|--|--|--|--|--|--|
| Dedicated day case<br>operating theatres ( $\geq 7$ ) | 0   |  |  |  |  |  |  |  |  |  |
|                                                       | 1-2 |  |  |  |  |  |  |  |  |  |
|                                                       | 3-4 |  |  |  |  |  |  |  |  |  |
|                                                       | 5-6 |  |  |  |  |  |  |  |  |  |

Total knee replacement, TKR; Unicompartmental knee replacement, UKR; American Society of Anesthesiologists, ASA; Index of multiple deprivation, IMD; European

Quality of life-five domain, EQ-5D-3L; low-molecular-weight heparin, LMWH; full time equivalent, FTE (proportion of full time contracted hours).

**eTable 9.** Logistic Multilevel Models of Complications at 6 Months for Patients Who Underwent Planned Primary Hip Replacement

|                                                                                               | Categories                   | Patient model |                 |       | Surgical model |                 |       | Hospital organisation model |                 |       |
|-----------------------------------------------------------------------------------------------|------------------------------|---------------|-----------------|-------|----------------|-----------------|-------|-----------------------------|-----------------|-------|
|                                                                                               |                              | Coef.         | 95% CI          | P     | Coef.          | 95% CI          | P     | Coef.                       | 95% CI          | P     |
| <i>Intercept</i>                                                                              |                              | -4.95         | [-5.24-(-4.65)] | <0.01 | -4.85          | [-5.16-(-4.54)] | <0.01 | -4.84                       | [-5.16-(-4.53)] | <0.01 |
| <i>Patient factors</i>                                                                        |                              |               |                 |       |                |                 |       |                             |                 |       |
| Calendar year (2016)                                                                          | 2015                         | 0.10          | [0.04-0.16]     | <0.01 | 0.08           | [0.02-0.14]     | 0.01  | 0.08                        | [0.02-0.14]     | 0.01  |
|                                                                                               | 2016                         | 0.11          | [0.05-0.17]     | <0.01 | 0.11           | [0.05-0.17]     | <0.01 | 0.11                        | [0.05-0.17]     | <0.01 |
| Age (<50 years)                                                                               | 50-59                        | 0.08          | [-0.10-0.25]    | 0.38  | 0.07           | [-0.10-0.25]    | 0.41  | 0.08                        | [-0.10-0.25]    | 0.40  |
|                                                                                               | 60-69                        | 0.22          | [0.06-0.39]     | 0.01  | 0.20           | [0.04-0.37]     | 0.02  | 0.21                        | [0.04-0.37]     | 0.02  |
|                                                                                               | 70-79                        | 0.55          | [0.39-0.71]     | <0.01 | 0.50           | [0.33-0.67]     | <0.01 | 0.50                        | [0.33-0.67]     | <0.01 |
|                                                                                               | 80-84                        | 0.86          | [0.69-1.03]     | <0.01 | 0.81           | [0.63-0.99]     | <0.01 | 0.81                        | [0.63-0.99]     | <0.01 |
|                                                                                               | ≥85                          | 1.16          | [0.98-1.33]     | <0.01 | 1.11           | [0.92-1.29]     | <0.01 | 1.10                        | [0.91-1.28]     | <0.01 |
| Sex (woman)                                                                                   | man                          | 0.25          | [0.20-0.30]     | <0.01 | 0.27           | [0.21-0.32]     | <0.01 | 0.27                        | [0.22-0.32]     | <0.01 |
| BMI, (kg/m <sup>2</sup> )                                                                     |                              | 0.01          | [0.01-0.02]     | <0.01 | 0.01           | [0.01-0.02]     | <0.01 | 0.01                        | [0.01-0.02]     | <0.01 |
| Pre-operative ASA<br>physical function score<br>(Mild disease not<br>incapacitating, grade 2) | Fit and healthy<br>(grade 1) | -0.22         | [-0.32-(-0.12)] | <0.01 | -0.21          | [-0.31-(-0.11)] | <0.01 | -0.21                       | [-0.31-(-0.10)] | <0.01 |

|                                                  |                                                                         |       |              |       |       |              |       |       |              |       |
|--------------------------------------------------|-------------------------------------------------------------------------|-------|--------------|-------|-------|--------------|-------|-------|--------------|-------|
|                                                  | Incapacitating systemic disease (grade 3)                               | 0.43  | [0.37-0.49]  | <0.01 | 0.42  | [0.37-0.48]  | <0.01 | 0.41  | [0.35-0.47]  | <0.01 |
|                                                  | Life threatening disease or Expected to die within 24h (grades 4 and 5) | 0.85  | [0.63-1.08]  | <0.01 | 0.83  | [0.61-1.06]  | <0.01 | 0.82  | [0.59-1.04]  | <0.01 |
| IMD (Most deprived 20%)                          | Least deprived 20%                                                      | -0.04 | [-0.12-0.05] | 0.38  | -0.02 | [-0.11-0.06] | 0.56  | -0.02 | [-0.11-0.06] | 0.60  |
|                                                  | Less deprived 20-40%                                                    | -0.05 | [-0.13-0.03] | 0.21  | -0.04 | [-0.13-0.04] | 0.30  | -0.04 | [-0.12-0.04] | 0.34  |
|                                                  | Less deprived 40-60%                                                    | 0.08  | [-0.01-0.16] | 0.07  | 0.08  | [<0.01-0.16] | 0.06  | 0.08  | [<0.01-0.17] | 0.06  |
|                                                  | More deprived 20-40%                                                    | 0.09  | [0.01-0.18]  | 0.03  | 0.10  | [0.01-0.18]  | 0.03  | 0.10  | [0.01-0.18]  | 0.03  |
| Rural/Urban indicator (Urban >=10,000 habitants) | Town and fringe                                                         |       |              |       |       |              |       |       |              |       |

|                                                                  |                              |       |                 |       |       |                 |       |       |                 |       |
|------------------------------------------------------------------|------------------------------|-------|-----------------|-------|-------|-----------------|-------|-------|-----------------|-------|
|                                                                  | Village/isolated             |       |                 |       |       |                 |       |       |                 |       |
| Primary indication<br>(Osteoarthritis)                           | Osteoarthritis<br>and Other* | 0.36  | [0.23-0.49]     | <0.01 | 0.35  | [0.23-0.48]     | <0.01 | 0.35  | [0.22-0.47]     | <0.01 |
| Charlson score (None,<br>0)                                      | Mild (1)                     | 0.33  | [0.27-0.39]     | <0.01 | 0.33  | [0.27-0.39]     | <0.01 | 0.33  | [0.27-0.39]     | <0.01 |
|                                                                  | Moderate (2)                 | 0.50  | [0.41-0.58]     | <0.01 | 0.50  | [0.41-0.58]     | <0.01 | 0.49  | [0.41-0.57]     | <0.01 |
|                                                                  | Severe (≥3)                  | 0.75  | [0.66-0.85]     | <0.01 | 0.75  | [0.65-0.84]     | <0.01 | 0.74  | [0.64-0.83]     | <0.01 |
| EQ-5D-3L (Highest<br>quintile)                                   | Lowest quintile              | -0.14 | [-0.21-(-0.06)] | <0.01 | -0.14 | [-0.21-(-0.06)] | <0.01 | -0.14 | [-0.21-(-0.06)] | <0.01 |
|                                                                  | 2nd quintile                 | -0.28 | [-0.36-(-0.20)] | <0.01 | -0.28 | [-0.36-(-0.19)] | <0.01 | -0.27 | [-0.36-(-0.19)] | <0.01 |
|                                                                  | 3rd quintile                 | -0.29 | [-0.37-(-0.20)] | <0.01 | -0.28 | [-0.37-(-0.19)] | <0.01 | -0.28 | [-0.36-(-0.19)] | <0.01 |
|                                                                  | 4th quintile                 | -0.36 | [-0.45-(-0.27)] | <0.01 | -0.35 | [-0.44-(-0.26)] | <0.01 | -0.35 | [-0.43-(-0.26)] | <0.01 |
| <i>Surgical factors</i>                                          |                              |       |                 |       |       |                 |       |       |                 |       |
| Lead surgeon<br>experience<br>(Consultant)                       | Other**                      |       |                 |       |       |                 |       |       |                 |       |
| Surgical volume per<br>lead surgeon (>150<br>surgeries per year) | ≤10                          |       |                 |       |       |                 |       |       |                 |       |



|                                                            |                 |  |  |  |       |                 |       |       |                 |       |
|------------------------------------------------------------|-----------------|--|--|--|-------|-----------------|-------|-------|-----------------|-------|
|                                                            | 11-50           |  |  |  |       |                 |       |       |                 |       |
|                                                            | 51-75           |  |  |  |       |                 |       |       |                 |       |
|                                                            | 76-100          |  |  |  |       |                 |       |       |                 |       |
|                                                            | 101-150         |  |  |  |       |                 |       |       |                 |       |
| Surgical volume per unit (Surgeries per year, $\geq 500$ ) | $\leq 200$      |  |  |  | 0.12  | [0.03-0.20]     | 0.01  | 0.12  | [0.04-0.21]     | 0.01  |
|                                                            | 200-299         |  |  |  | 0.08  | [<0.01-0.17]    | 0.06  | 0.08  | [-0.01-0.17]    | 0.07  |
|                                                            | 300-399         |  |  |  | 0.07  | [-0.01-0.16]    | 0.10  | 0.08  | [-0.01-0.17]    | 0.09  |
|                                                            | 400-499         |  |  |  | 0.05  | [-0.09-0.18]    | 0.48  | 0.05  | [-0.09-0.18]    | 0.48  |
| Minimally invasive surgery (No)                            | Yes             |  |  |  | -0.28 | [-0.43-(-0.13)] | <0.01 | -0.27 | [-0.43-(-0.12)] | <0.01 |
| Thromboprophylaxis (LMWH +/-Other)                         | None            |  |  |  | 0.14  | [-0.12-0.40]    | 0.29  | 0.15  | [-0.10-0.41]    | 0.25  |
|                                                            | Aspirin only    |  |  |  | 0.19  | [0.04-0.34]     | 0.01  | 0.19  | [0.04-0.34]     | 0.01  |
|                                                            | Other (no LMWH) |  |  |  | -0.04 | [-0.10-0.02]    | 0.15  | -0.03 | [-0.09-0.03]    | 0.28  |
| Mechanical prophylaxis (any)                               | None            |  |  |  |       |                 |       |       |                 |       |

|                                            |                                                                                              |  |  |  |       |                 |      |       |                 |      |
|--------------------------------------------|----------------------------------------------------------------------------------------------|--|--|--|-------|-----------------|------|-------|-----------------|------|
| General anaesthesia<br>(No)                | Yes                                                                                          |  |  |  |       |                 |      |       |                 |      |
| Regional – epidural<br>anaesthesia (No)    | Yes                                                                                          |  |  |  |       |                 |      |       |                 |      |
| Regional – nerve block<br>anaesthesia (No) | Yes                                                                                          |  |  |  |       |                 |      |       |                 |      |
| Regional – spinal<br>anaesthesia (No)      | Yes                                                                                          |  |  |  | -0.08 | [-0.13-(-0.02)] | 0.01 | -0.07 | [-0.13-(-0.01)] | 0.02 |
| Type of approach<br>(Posterior)            | Anterior,<br>antero-lateral,<br>hardinge,<br>lateral,<br>trochanteric<br>osteotomy,<br>other |  |  |  |       |                 |      |       |                 |      |
| Femoral bone graft<br>(No)                 | Yes                                                                                          |  |  |  |       |                 |      |       |                 |      |
| Cup bone graft (No)                        | Yes                                                                                          |  |  |  |       |                 |      |       |                 |      |

|                                                         |                                 |  |  |  |       |                 |       |       |                 |       |
|---------------------------------------------------------|---------------------------------|--|--|--|-------|-----------------|-------|-------|-----------------|-------|
| Primary cup fixation<br>(Cementless)                    | Cemented                        |  |  |  |       |                 |       |       |                 |       |
| Type of primary stem<br>fixation (Cemented<br>THR stem) | Not available or<br>Resurfacing |  |  |  |       |                 |       |       |                 |       |
|                                                         | Cementless<br>THR stem          |  |  |  |       |                 |       |       |                 |       |
| Bearing surface (MoP)                                   | MoM                             |  |  |  | -0.20 | [-1.17-0.77]    | 0.69  | -0.21 | [-1.17-0.76]    | 0.68  |
|                                                         | CoC                             |  |  |  | -0.04 | [-0.15-0.07]    | 0.44  | -0.05 | [-0.16-0.06]    | 0.38  |
|                                                         | CoP                             |  |  |  | -0.08 | [-0.15-(-0.01)] | 0.03  | -0.08 | [-0.16-(-0.01)] | 0.02  |
|                                                         | CoM or MoC or<br>unknown        |  |  |  | 0.13  | [-0.09-0.36]    | 0.25  | 0.12  | [-0.10-0.35]    | 0.28  |
| Femoral head size<br>( $\leq 28$ mm)                    | 32                              |  |  |  | -0.10 | [-0.16-(-0.04)] | <0.01 | -0.10 | [-0.16-(-0.04)] | <0.01 |
|                                                         | 36-42                           |  |  |  | -0.06 | [-0.13-0.02]    | 0.17  | -0.06 | [-0.14-0.02]    | 0.14  |
|                                                         | $\geq 44$                       |  |  |  | -0.13 | [-0.98-0.73]    | 0.77  | -0.13 | [-0.99-0.73]    | 0.77  |
| <i>Hospital organisation<br/>factors</i>                |                                 |  |  |  |       |                 |       |       |                 |       |

|                                                                        |                                                 |  |  |  |  |  |  |  |       |                 |      |
|------------------------------------------------------------------------|-------------------------------------------------|--|--|--|--|--|--|--|-------|-----------------|------|
| Unit type (Public hospital)                                            | Private hospital                                |  |  |  |  |  |  |  | -0.08 | [-0.15-(-0.01)] | 0.03 |
|                                                                        | Independent sector (private) – treatment centre |  |  |  |  |  |  |  | -0.13 | [-0.27-0.01]    | 0.06 |
| FTE of speciality groups on trauma and orthopaedic surgery (0-24 FTEs) | 25-29                                           |  |  |  |  |  |  |  |       |                 |      |
|                                                                        | 30-39                                           |  |  |  |  |  |  |  |       |                 |      |
|                                                                        | 40-49                                           |  |  |  |  |  |  |  |       |                 |      |
|                                                                        | >50                                             |  |  |  |  |  |  |  |       |                 |      |
| Consultant FTE (0-24 FTEs)                                             | 25-29                                           |  |  |  |  |  |  |  |       |                 |      |
|                                                                        | 30-39                                           |  |  |  |  |  |  |  |       |                 |      |
|                                                                        | 40-49                                           |  |  |  |  |  |  |  |       |                 |      |
|                                                                        | >50                                             |  |  |  |  |  |  |  |       |                 |      |

|                                                                                   |         |  |  |  |  |  |  |      |              |      |
|-----------------------------------------------------------------------------------|---------|--|--|--|--|--|--|------|--------------|------|
| middle grade doctor<br>FTE (0-24 FTEs)                                            | 25-29   |  |  |  |  |  |  | 0.09 | [<0.01-0.17] | 0.04 |
|                                                                                   | 30-39   |  |  |  |  |  |  | 0.05 | [-0.03-0.13] | 0.19 |
|                                                                                   | 40-49   |  |  |  |  |  |  | 0.07 | [-0.03-0.16] | 0.17 |
|                                                                                   | >50     |  |  |  |  |  |  | 0.03 | [-0.05-0.12] | 0.45 |
| early career doctor FTE<br>(0-24 FTEs)                                            | 25-29   |  |  |  |  |  |  |      |              |      |
|                                                                                   | 30-39   |  |  |  |  |  |  |      |              |      |
| Total beds available<br>overnight (0-349)                                         | 350-499 |  |  |  |  |  |  |      |              |      |
|                                                                                   | 500-699 |  |  |  |  |  |  |      |              |      |
|                                                                                   | 700-999 |  |  |  |  |  |  |      |              |      |
|                                                                                   | ≥1000   |  |  |  |  |  |  |      |              |      |
| Total beds available<br>overnight for trauma<br>and orthopaedic<br>surgery (0-34) | 35-49   |  |  |  |  |  |  |      |              |      |
|                                                                                   | 50-69   |  |  |  |  |  |  |      |              |      |
|                                                                                   | 70-99   |  |  |  |  |  |  |      |              |      |

|                                                             |       |  |  |  |  |  |  |  |  |  |
|-------------------------------------------------------------|-------|--|--|--|--|--|--|--|--|--|
|                                                             | ≥100  |  |  |  |  |  |  |  |  |  |
| Total beds available<br>overnight for<br>rehabilitation (0) | >0-10 |  |  |  |  |  |  |  |  |  |
|                                                             | 11-20 |  |  |  |  |  |  |  |  |  |
|                                                             | ≥20   |  |  |  |  |  |  |  |  |  |
| Operating theatres<br>(<10)                                 | 10-14 |  |  |  |  |  |  |  |  |  |
|                                                             | 15-19 |  |  |  |  |  |  |  |  |  |
|                                                             | 20-24 |  |  |  |  |  |  |  |  |  |
|                                                             | ≥25   |  |  |  |  |  |  |  |  |  |
| Dedicated day case<br>operating theatres (≥7)               | 0     |  |  |  |  |  |  |  |  |  |
|                                                             | 1-2   |  |  |  |  |  |  |  |  |  |
|                                                             | 3-4   |  |  |  |  |  |  |  |  |  |
|                                                             | 5-6   |  |  |  |  |  |  |  |  |  |

American Society of Anesthesiologists, ASA; Index of multiple deprivation, IMD; European Quality of life-five domain, EQ-5D-3L; low-molecular-weight heparin, LMWH; total hip replacement, THR; metal-on-metal, MoM; metal-on-polyethylene, MoP; ceramic-on-ceramic, CoC; ceramic-on-polyethylene, CoP; ceramic-on-metal, CoM; metal-on-ceramic, MoC; full time equivalent, FTE (proportion of full time contracted hours).

**eTable 10.** Logistic Multilevel Models of Complications at 6 Months for Patients Who Underwent Planned Primary Hip TKR/UKR

|                                                                                               | Categories                   | Patient model |                 |       | Surgical model |                 |       | Hospital organisation model |                 |       |
|-----------------------------------------------------------------------------------------------|------------------------------|---------------|-----------------|-------|----------------|-----------------|-------|-----------------------------|-----------------|-------|
|                                                                                               |                              | Coef.         | 95% CI          | P     | Coef.          | 95% CI          | P     | Coef.                       | 95% CI          | P     |
| <i>Intercept</i>                                                                              |                              | -3.92         | [-4.20-(-3.65)] | <0.01 | -4.40          | [-4.70-(-4.10)] | <0.01 | -4.39                       | [-4.70-(-4.09)] | <0.01 |
| <i>Patient factors</i>                                                                        |                              |               |                 |       |                |                 |       |                             |                 |       |
| Calendar year (2016)                                                                          | 2015                         | 0.15          | [0.09-0.20]     | <0.01 | 0.14           | [0.09-0.20]     | <0.01 | 0.14                        | [0.08-0.19]     | <0.01 |
|                                                                                               | 2016                         | 0.15          | [0.09-0.20]     | <0.01 | 0.14           | [0.09-0.20]     | <0.01 | 0.14                        | [0.08-0.20]     | <0.01 |
| Age (<50 years)                                                                               | 50-59                        | -0.18         | [-0.35-(-0.01)] | 0.05  | -0.20          | [-0.38-(-0.03)] | 0.03  | -0.20                       | [-0.38-(-0.02)] | 0.03  |
|                                                                                               | 60-69                        | -0.21         | [-0.38-(-0.04)] | 0.01  | -0.27          | [-0.44-(-0.10)] | <0.01 | -0.26                       | [-0.43-(-0.09)] | <0.01 |
|                                                                                               | 70-79                        | -0.01         | [-0.18-0.16]    | 0.94  | -0.07          | [-0.24-0.10]    | 0.44  | -0.06                       | [-0.23-0.11]    | 0.49  |
|                                                                                               | 80-84                        | 0.25          | [0.08-0.43]     | 0.01  | 0.19           | [0.01-0.37]     | 0.04  | 0.19                        | [0.02-0.37]     | 0.03  |
|                                                                                               | ≥85                          | 0.61          | [0.43-0.80]     | <0.01 | 0.55           | [0.36-0.73]     | <0.01 | 0.55                        | [0.37-0.73]     | <0.01 |
| Sex (woman)                                                                                   | man                          | 0.23          | [0.19-0.28]     | <0.01 | 0.24           | [0.20-0.29]     | <0.01 | 0.24                        | [0.20-0.29]     | <0.01 |
| BMI, (kg/m <sup>2</sup> )                                                                     |                              |               |                 |       |                |                 |       |                             |                 |       |
| Pre-operative ASA<br>physical function score<br>(Mild disease not<br>incapacitating, grade 2) | Fit and healthy<br>(grade 1) | -0.22         | [-0.32-(-0.12)] | <0.01 | -0.20          | [-0.30-(-0.10)] | <0.01 | -0.19                       | [-0.29-(-0.09)] | <0.01 |

|                                                  |                                                                         |       |                 |       |       |                 |       |       |                 |       |
|--------------------------------------------------|-------------------------------------------------------------------------|-------|-----------------|-------|-------|-----------------|-------|-------|-----------------|-------|
|                                                  | Incapacitating systemic disease (grade 3)                               | 0.42  | [0.36-0.47]     | <0.01 | 0.41  | [0.35-0.46]     | <0.01 | 0.39  | [0.34-0.45]     | <0.01 |
|                                                  | Life threatening disease or Expected to die within 24h (grades 4 and 5) | 0.94  | [0.68-1.20]     | <0.01 | 0.90  | [0.64-1.16]     | <0.01 | 0.88  | [0.62-1.14]     | <0.01 |
| IMD (Most deprived 20%)                          | Least deprived 20%                                                      | -0.13 | [-0.20-(-0.05)] | <0.01 | -0.11 | [-0.19-(-0.03)] | 0.01  | -0.11 | [-0.18-(-0.03)] | 0.01  |
|                                                  | Less deprived 20-40%                                                    | -0.08 | [-0.15-(-0.01)] | 0.03  | -0.07 | [-0.14-<0.01]   | 0.07  | -0.06 | [-0.14-0.01]    | 0.09  |
|                                                  | Less deprived 40-60%                                                    | -0.03 | [-0.10-0.04]    | 0.44  | -0.03 | [-0.10-0.05]    | 0.46  | -0.03 | [-0.10-0.05]    | 0.48  |
|                                                  | More deprived 20-40%                                                    | 0.03  | [-0.04-0.10]    | 0.43  | 0.03  | [-0.04-0.10]    | 0.40  | 0.03  | [-0.04-0.10]    | 0.43  |
| Rural/Urban indicator (Urban >=10,000 habitants) | Town and fringe                                                         |       |                 |       |       |                 |       |       |                 |       |



|                                                                  |                              |       |                 |       |       |                 |       |       |                 |       |
|------------------------------------------------------------------|------------------------------|-------|-----------------|-------|-------|-----------------|-------|-------|-----------------|-------|
|                                                                  | Village/isolated             |       |                 |       |       |                 |       |       |                 |       |
| Primary indication<br>(Osteoarthritis)                           | Osteoarthritis<br>and Other* | 0.26  | [0.07-0.44]     | 0.01  | 0.24  | [0.05-0.43]     | 0.01  | 0.23  | [0.04-0.41]     | 0.02  |
| Charlson score (None,<br>0)                                      | Mild (1)                     | 0.28  | [0.22-0.33]     | <0.01 | 0.28  | [0.23-0.33]     | <0.01 | 0.27  | [0.22-0.33]     | <0.01 |
|                                                                  | Moderate (2)                 | 0.41  | [0.34-0.49]     | <0.01 | 0.41  | [0.34-0.49]     | <0.01 | 0.40  | [0.33-0.48]     | <0.01 |
|                                                                  | Severe ( $\geq 3$ )          | 0.69  | [0.60-0.78]     | <0.01 | 0.69  | [0.60-0.78]     | <0.01 | 0.68  | [0.58-0.77]     | <0.01 |
| EQ-5D-3L (Lowest<br>quintile)                                    | 2nd quintile                 | -0.08 | [-0.15-<0.01]   | 0.04  | -0.07 | [-0.15-<0.01]   | 0.05  | -0.07 | [-0.15-<0.01]   | 0.06  |
|                                                                  | 3rd quintile                 | -0.18 | [-0.25-(-0.12)] | <0.01 | -0.18 | [-0.24-(-0.11)] | <0.01 | -0.17 | [-0.24-(-0.11)] | <0.01 |
|                                                                  | 4th quintile                 | -0.21 | [-0.29-(-0.12)] | <0.01 | -0.20 | [-0.29-(-0.11)] | <0.01 | -0.19 | [-0.28-(-0.10)] | <0.01 |
|                                                                  | Highest quintile             | -0.26 | [-0.33-(-0.20)] | <0.01 | -0.25 | [-0.32-(-0.19)] | <0.01 | -0.25 | [-0.31-(-0.18)] | <0.01 |
| <i>Surgical factors</i>                                          |                              |       |                 |       |       |                 |       |       |                 |       |
| Lead surgeon<br>experience<br>(Consultant)                       | Other**                      |       |                 |       |       |                 |       |       |                 |       |
| Surgical volume per<br>lead surgeon (>150<br>surgeries per year) | $\leq 10$                    |       |                 |       | -0.10 | [-0.31-0.10]    | 0.32  |       |                 |       |

|                                                            |                 |  |  |  |       |                 |      |      |              |      |
|------------------------------------------------------------|-----------------|--|--|--|-------|-----------------|------|------|--------------|------|
|                                                            | 11-50           |  |  |  | 0.08  | [<0.01-0.16]    | 0.06 |      |              |      |
|                                                            | 51-75           |  |  |  | 0.07  | [-0.01-0.15]    | 0.09 |      |              |      |
|                                                            | 76-100          |  |  |  | 0.06  | [-0.02-0.14]    | 0.15 |      |              |      |
|                                                            | 101-150         |  |  |  | 0.08  | [<0.01-0.16]    | 0.04 |      |              |      |
| Surgical volume per unit (Surgeries per year, $\geq 500$ ) | $\leq 200$      |  |  |  | 0.09  | [0.01-0.18]     | 0.03 | 0.09 | [0.01-0.18]  | 0.03 |
|                                                            | 200-299         |  |  |  | 0.08  | [0.01-0.16]     | 0.03 | 0.08 | [<0.01-0.16] | 0.04 |
|                                                            | 300-399         |  |  |  | 0.08  | [<0.01-0.16]    | 0.05 | 0.08 | [<0.01-0.16] | 0.04 |
|                                                            | 400-499         |  |  |  | 0.05  | [-0.03-0.14]    | 0.24 | 0.05 | [-0.04-0.13] | 0.27 |
| Minimally invasive surgery (No)                            | Yes             |  |  |  |       |                 |      |      |              |      |
| Thromboprophylaxis (LMWH +/-Other)                         | None            |  |  |  | -0.27 | [-0.53-(-0.01)] | 0.05 |      |              |      |
|                                                            | Aspirin only    |  |  |  | -0.04 | [-0.19-0.10]    | 0.57 |      |              |      |
|                                                            | Other (no LMWH) |  |  |  | -0.03 | [-0.09-0.03]    | 0.27 |      |              |      |
| Mechanical prophylaxis (any)                               | None            |  |  |  | 0.13  | [<0.01-0.27]    | 0.05 |      |              |      |

|                                            |                         |  |  |  |      |             |       |      |             |       |
|--------------------------------------------|-------------------------|--|--|--|------|-------------|-------|------|-------------|-------|
| General anaesthesia<br>(No)                | Yes                     |  |  |  | 0.09 | [0.04-0.14] | <0.01 | 0.08 | [0.03-0.13] | <0.01 |
| Regional – epidural<br>anaesthesia (No)    | Yes                     |  |  |  |      |             |       |      |             |       |
| Regional – nerve block<br>anaesthesia (No) | Yes                     |  |  |  |      |             |       |      |             |       |
| Regional – spinal<br>anaesthesia (No)      | Yes                     |  |  |  |      |             |       |      |             |       |
| Type of approach<br>(Medial parapatellar)  | Lateral<br>parapatellar |  |  |  |      |             |       |      |             |       |
|                                            | Mid-Vastus              |  |  |  |      |             |       |      |             |       |
|                                            | Sub-Vastus              |  |  |  |      |             |       |      |             |       |
|                                            | Other                   |  |  |  |      |             |       |      |             |       |
| Femoral bone graft<br>(No)                 | Yes                     |  |  |  |      |             |       |      |             |       |
| Tibia bone graft (No)                      | Yes                     |  |  |  |      |             |       |      |             |       |
| Primary femoral<br>fixation (Cemented)     | Cementless              |  |  |  |      |             |       |      |             |       |

|                                                                                  |                                                          |  |  |  |      |             |       |       |                 |       |
|----------------------------------------------------------------------------------|----------------------------------------------------------|--|--|--|------|-------------|-------|-------|-----------------|-------|
| Primary Tibial fixation<br>(Cemented)                                            | Cementless                                               |  |  |  |      |             |       |       |                 |       |
| Type of knee implant<br>(TKR)                                                    | UKR                                                      |  |  |  | 0.41 | [0.30-0.52] | <0.01 | 0.41  | [0.30-0.52]     | <0.01 |
| <i>Hospital organisation<br/>factors</i>                                         |                                                          |  |  |  |      |             |       |       |                 |       |
| Unit type (Public<br>hospital)                                                   | Private hospital                                         |  |  |  |      |             |       | -0.10 | [-0.16-(-0.04)] | <0.01 |
|                                                                                  | Independent<br>sector (private)<br>– treatment<br>centre |  |  |  |      |             |       | -0.30 | [-0.42-(-0.17)] | <0.01 |
| FTE of speciality<br>groups on trauma and<br>orthopaedic surgery (0-<br>24 FTEs) | 25-29                                                    |  |  |  |      |             |       |       |                 |       |
|                                                                                  | 30-39                                                    |  |  |  |      |             |       |       |                 |       |
|                                                                                  | 40-49                                                    |  |  |  |      |             |       |       |                 |       |
|                                                                                  | >50                                                      |  |  |  |      |             |       |       |                 |       |

|                                        |         |  |  |  |  |  |  |       |              |      |
|----------------------------------------|---------|--|--|--|--|--|--|-------|--------------|------|
| Consultant FTE (0-24 FTEs)             | 25-29   |  |  |  |  |  |  |       |              |      |
|                                        | 30-39   |  |  |  |  |  |  |       |              |      |
|                                        | 40-49   |  |  |  |  |  |  |       |              |      |
|                                        | >50     |  |  |  |  |  |  |       |              |      |
| middle grade doctor FTE (0-24 FTEs)    | 25-29   |  |  |  |  |  |  | -0.01 | [-0.10-0.07] | 0.80 |
|                                        | 30-39   |  |  |  |  |  |  | 0.03  | [-0.06-0.11] | 0.54 |
|                                        | 40-49   |  |  |  |  |  |  | 0.11  | [-0.01-0.22] | 0.07 |
|                                        | >50     |  |  |  |  |  |  | 0.10  | [<0.01-0.21] | 0.05 |
| early career doctor FTE (0-24 FTEs)    | 25-29   |  |  |  |  |  |  |       |              |      |
|                                        | 30-39   |  |  |  |  |  |  |       |              |      |
| Total beds available overnight (0-349) | 350-499 |  |  |  |  |  |  |       |              |      |
|                                        | 500-699 |  |  |  |  |  |  |       |              |      |
|                                        | 700-999 |  |  |  |  |  |  |       |              |      |
|                                        | ≥1000   |  |  |  |  |  |  |       |              |      |

|                                                                          |       |  |  |  |  |  |  |      |             |       |
|--------------------------------------------------------------------------|-------|--|--|--|--|--|--|------|-------------|-------|
| Total beds available overnight for trauma and orthopaedic surgery (0-34) | 35-49 |  |  |  |  |  |  |      |             |       |
|                                                                          | 50-69 |  |  |  |  |  |  |      |             |       |
|                                                                          | 70-99 |  |  |  |  |  |  |      |             |       |
|                                                                          | ≥100  |  |  |  |  |  |  |      |             |       |
| Total beds available overnight for rehabilitation (0)                    | >0-10 |  |  |  |  |  |  |      |             |       |
|                                                                          | 11-20 |  |  |  |  |  |  |      |             |       |
|                                                                          | ≥20   |  |  |  |  |  |  |      |             |       |
| Operating theatres (<10)                                                 | 10-14 |  |  |  |  |  |  |      |             |       |
|                                                                          | 15-19 |  |  |  |  |  |  |      |             |       |
|                                                                          | 20-24 |  |  |  |  |  |  |      |             |       |
|                                                                          | ≥25   |  |  |  |  |  |  |      |             |       |
| Dedicated day case operating theatres (≥7)                               | 0     |  |  |  |  |  |  | 0.12 | [0.04-0.20] | <0.01 |

|  |     |  |  |  |  |  |  |      |              |      |
|--|-----|--|--|--|--|--|--|------|--------------|------|
|  | 1-2 |  |  |  |  |  |  | 0.05 | [-0.02-0.13] | 0.18 |
|  | 3-4 |  |  |  |  |  |  | 0.10 | [0.02-0.17]  | 0.02 |
|  | 5-6 |  |  |  |  |  |  | 0.11 | [0.02-0.20]  | 0.01 |

Total knee replacement, TKR; Unicompartmental knee replacement, UKR; American Society of Anesthesiologists, ASA; Index of multiple deprivation, IMD; European Quality of life-five domain, EQ-5D-3L; low-molecular-weight heparin, LMWH; full time equivalent, FTE (proportion of full time contracted hours).

**eTable 11.** Estimation of Patient Outcomes of Hip Replacement, TKR, and UKR, Adjusted for Patient, Surgical, and Hospital Organizational Factors

| Mean LOS (days)                     |                |                              |                |                         |                |                              |                |
|-------------------------------------|----------------|------------------------------|----------------|-------------------------|----------------|------------------------------|----------------|
| Hip replacements                    |                |                              |                | TKRs/UKRs               |                |                              |                |
| <i>5 shortest</i>                   |                | <i>5 longest</i>             |                | <i>5 shortest</i>       |                | <i>5 longest</i>             |                |
| CCG                                 | Predicted (SD) | CCG                          | Predicted (SD) | CCG                     | Predicted (SD) | CCG                          | Predicted (SD) |
| Scarborough and Ryedale             | 2.7 (1.0)      | Hillingdon                   | 6.1 (1.8)      | Scarborough and Ryedale | 2.9 (1.0)      | West London                  | 6.6 (1.7)      |
| Hastings and Rother                 | 2.9 (1.0)      | Harrow                       | 6.1 (2.1)      | Northumberland          | 3.2 (0.7)      | Hammersmith and Fulham       | 6.6 (1.8)      |
| Hambleton, Richmondshire and Whitby | 3.1 (0.8)      | Camden                       | 6.1 (1.9)      | Bassetlaw               | 3.3 (1.4)      | Camden                       | 6.5 (1.8)      |
| Northumberland                      | 3.1 (0.9)      | Barnet                       | 5.8 (2.0)      | Hastings and Rother     | 3.4 (1.0)      | Central London (Westminster) | 6.1 (1.6)      |
| High Weald Lewes Havens             | 3.3 (1.4)      | Central London (Westminster) | 5.7 (2.0)      | Salford                 | 3.4 (1.0)      | Barnet                       | 6.1 (1.6)      |
| Mean of bed-day costs (£)           |                |                              |                |                         |                |                              |                |
| Hip replacements                    |                |                              |                | TKRs/UKRs               |                |                              |                |



| <i>5 lowest</i>                     |                | <i>5 highest</i> |                | <i>5 lowest</i>                 |                | <i>5 highest</i>             |                |
|-------------------------------------|----------------|------------------|----------------|---------------------------------|----------------|------------------------------|----------------|
| CCG                                 | Predicted (SD) | CCG              | Predicted (SD) | CCG                             | Predicted (SD) | CCG                          | Predicted (SD) |
| Scarborough and Ryedale             | 4727 (1026)    | Hillingdon       | 8800 (1572)    | Scarborough and Ryedale         | 4758 (1096)    | Central London (Westminster) | 8692 (1507)    |
| Hastings and Rother                 | 4880 (1051)    | Harrow           | 8647 (1881)    | Northumberland                  | 4930 (720)     | City and Hackney             | 8686 (1247)    |
| Northumberland                      | 4998 (867)     | Camden           | 8250 (1561)    | Bassetlaw                       | 4960 (1329)    | Lewisham                     | 8676 (1585)    |
| Hambleton, Richmondshire and Whitby | 5187 (908)     | Barnet           | 8132 (1788)    | Hastings and Rother             | 5294 (1050)    | West London                  | 8639 (1438)    |
| High Weald Lewes Havens             | 5219 (1305)    | Waltham Forest   | 8060 (1710)    | Salford                         | 5344 (1008)    | Camden                       | 8600 (1493)    |
| <b>Mean OHS change (points)</b>     |                |                  |                | <b>Mean OKS change (points)</b> |                |                              |                |
| <i>5 highest</i>                    |                | <i>5 lowest</i>  |                | <i>5 highest</i>                |                | <i>5 lowest</i>              |                |
| CCG                                 | Predicted (SD) | CCG              | Predicted (SD) | CCG                             | Predicted (SD) | CCG                          | Predicted (SD) |

|                                              |                |                  |                |                                 |                |                        |                |
|----------------------------------------------|----------------|------------------|----------------|---------------------------------|----------------|------------------------|----------------|
| Mid Essex                                    | 24.6 (5.3)     | Brent            | 18.7 (6.2)     | Ipswich and East Suffolk        | 18.8 (4.2)     | City and Hackney       | 13.1 (4.3)     |
| Ipswich and East Suffolk                     | 24.1 (4.9)     | Islington        | 19.1 (6.4)     | Eastern Cheshire                | 18.5 (4.2)     | Newham                 | 13.4 (4.3)     |
| Stoke on Trent                               | 24.1 (5.0)     | Harrow           | 19.2 (6.6)     | Castle Point and Rochford       | 18.5 (4.0)     | Islington              | 13.6 (5.4)     |
| Scarborough and Ryedale                      | 23.7 (5.4)     | Kingston         | 19.4 (6.6)     | Warrington                      | 18.5 (4.2)     | Brighton and Hove      | 13.7 (4.5)     |
| Nene                                         | 23.6 (5.3)     | Croydon          | 19.4 (5.9)     | Nene                            | 18.5 (4.2)     | Barnet                 | 13.8 (4.7)     |
| <b>Mean of complications at 6 months (%)</b> |                |                  |                |                                 |                |                        |                |
| Hip replacements                             |                |                  |                | TKRs/UKRs                       |                |                        |                |
| <i>5 lowest</i>                              |                | <i>5 highest</i> |                | <i>5 lowest</i>                 |                | <i>5 highest</i>       |                |
| CCG                                          | Predicted (SD) | CCG              | Predicted (SD) | CCG                             | Predicted (SD) | CCG                    | Predicted (SD) |
| High Weald Lewes Havens                      | 3.0 (2.4)      | Tower Hamlets    | 5.4 (4.1)      | Hull                            | 2.9 (1.4)      | Herts Valleys          | 5.8 (2.7)      |
| Leeds West                                   | 3.1 (1.9)      | Newham           | 5.3 (3.2)      | Dartford, Gravesham and Swanley | 2.9 (1.4)      | South Devon and Torbay | 5.8 (3.2)      |

|                     |           |            |           |                                           |           |                  |           |
|---------------------|-----------|------------|-----------|-------------------------------------------|-----------|------------------|-----------|
| Solihull            | 3.2 (2.0) | Camden     | 5.2 (3.4) | Calderdale                                | 2.9 (1.5) | Tower<br>Hamlets | 5.5 (2.4) |
| Herefordshire       | 3.2 (2.0) | Enfield    | 5.1 (3.0) | Erewash                                   | 3.1 (1.6) | Camden           | 5.4 (2.8) |
| West Leicestershire | 3.2 (2.1) | Hillingdon | 5.0 (3.3) | Hambleton,<br>Richmondshire<br>and Whitby | 3.1 (1.4) | Newham           | 5.4 (2.7) |

Total knee replacement, TKR; Unicompartmental knee replacement, UKR; standard deviation, SD; Oxford hip score, OHS; Oxford knee score, OKS.

**eFigure 1.** Flow Diagram Showing Selection of Patients for Inclusion in This Study

Blue shows inclusion, and orange shows exclusion.

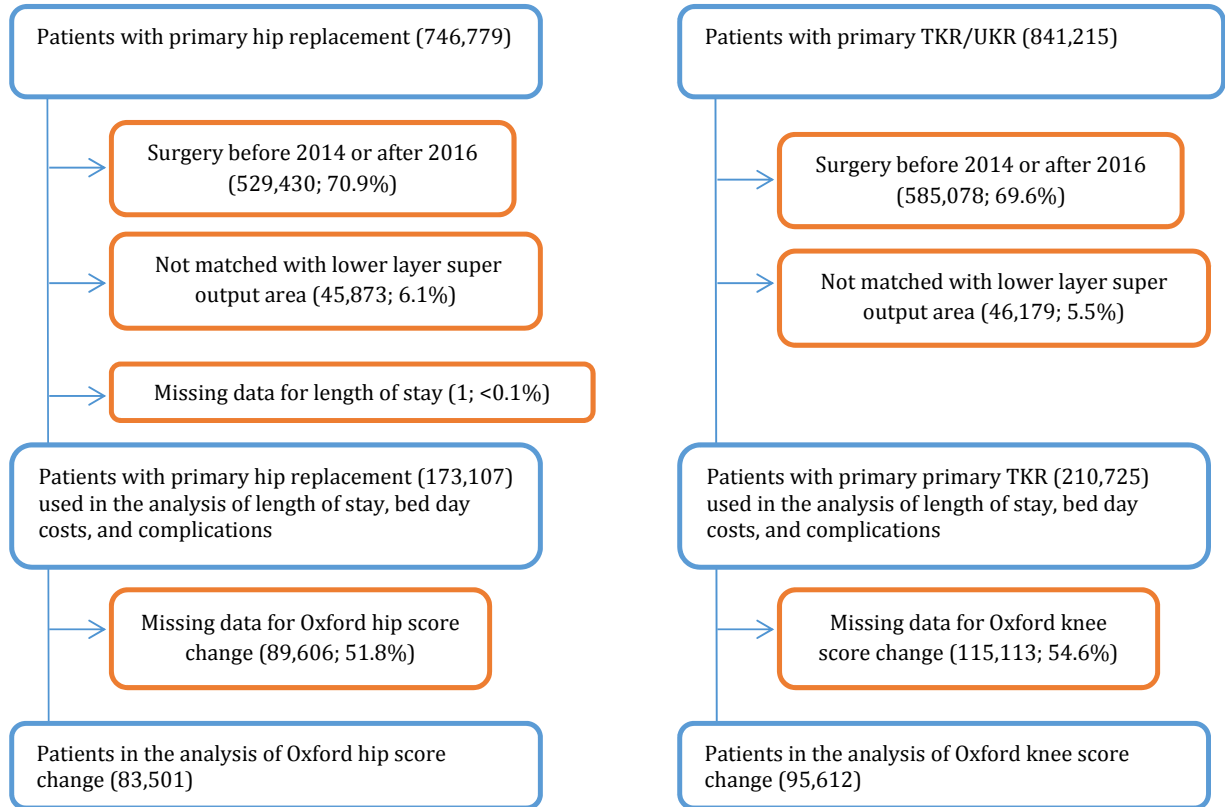

Total knee replacement, TKR; unicompartmental knee replacement, UKR.

**eFigure 2.** Caterpillar Plots of Patient Outcomes for Primary Knee Replacement by Health Area in England, 2014-2016

### Caterpillar plots by outcome after primary TKR/UKR showing Health Area estimations with 95% CIs

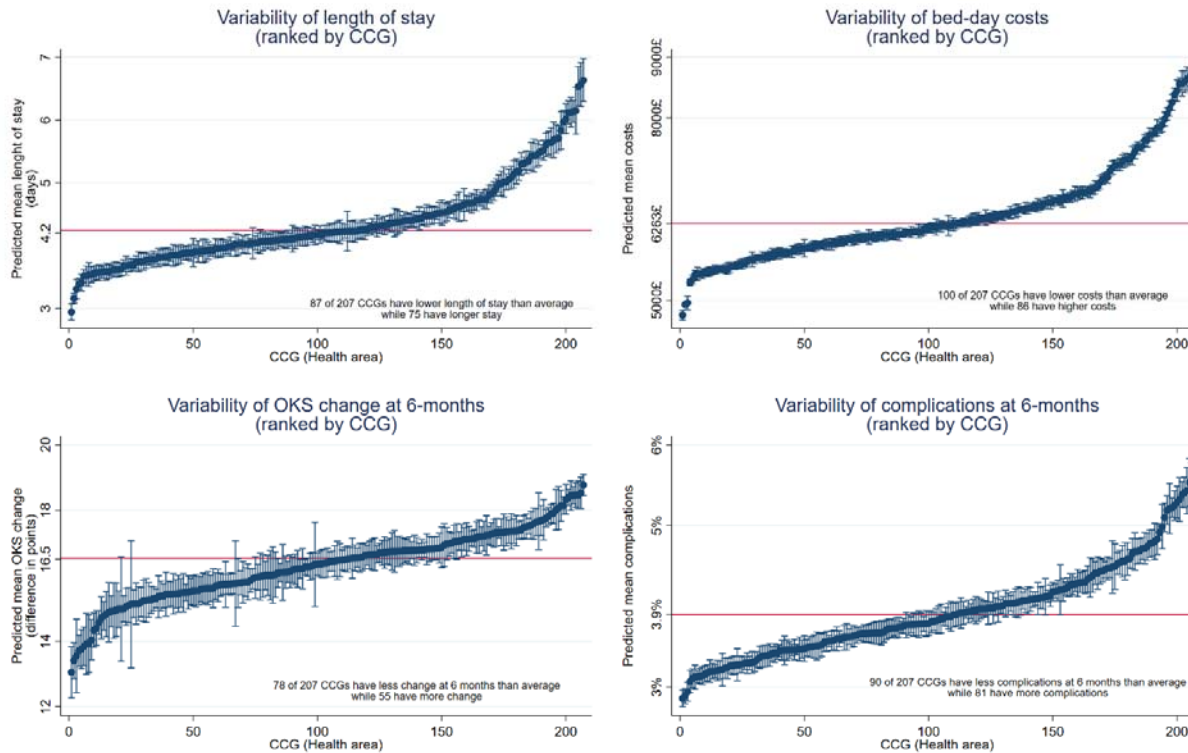

Horizontal red line is the predicted mean value for the sample. Confidence intervals, CI; clinical commissioning group, CCG; total knee replacement, TKR; unicompartmental knee replacement, UKR.; Oxford knee score, OKS.

**eFigure 3.** Trends for 5 Worst and Best Health Areas (Clinical Commissioning Group Areas) for Primary Hip Replacement, England, 2014-2016

## Trends for 5 worst and best CCGs

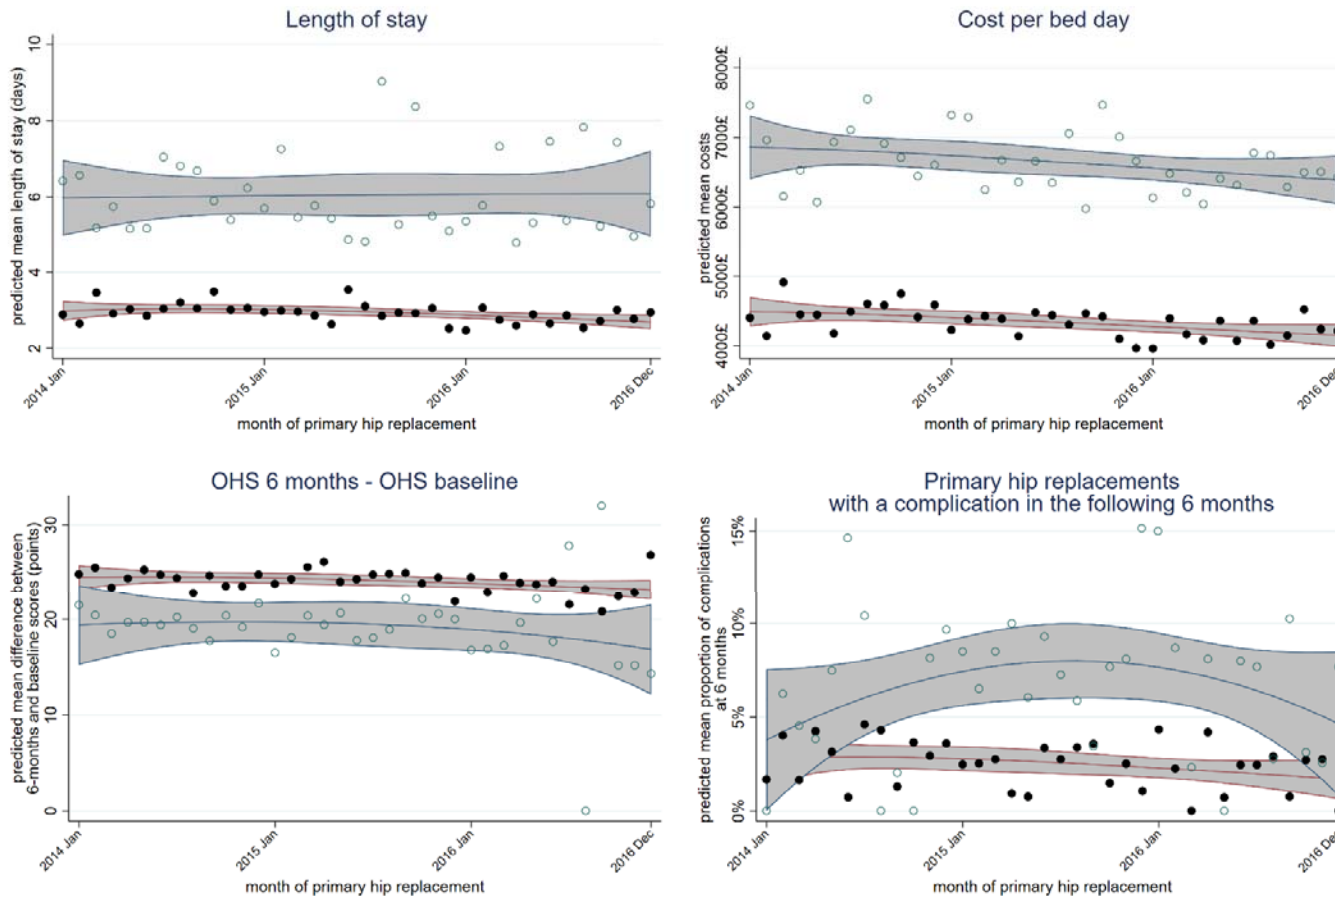

Oxford hip score, OHS; clinical commissioning group, CCG.

**eFigure 4.** Trends for 5 Worst and Best Health Areas (Clinical Commissioning Group Areas) for Primary TKR/UKR, England, 2014-2016

## Trends for 5 worst and best CCGs

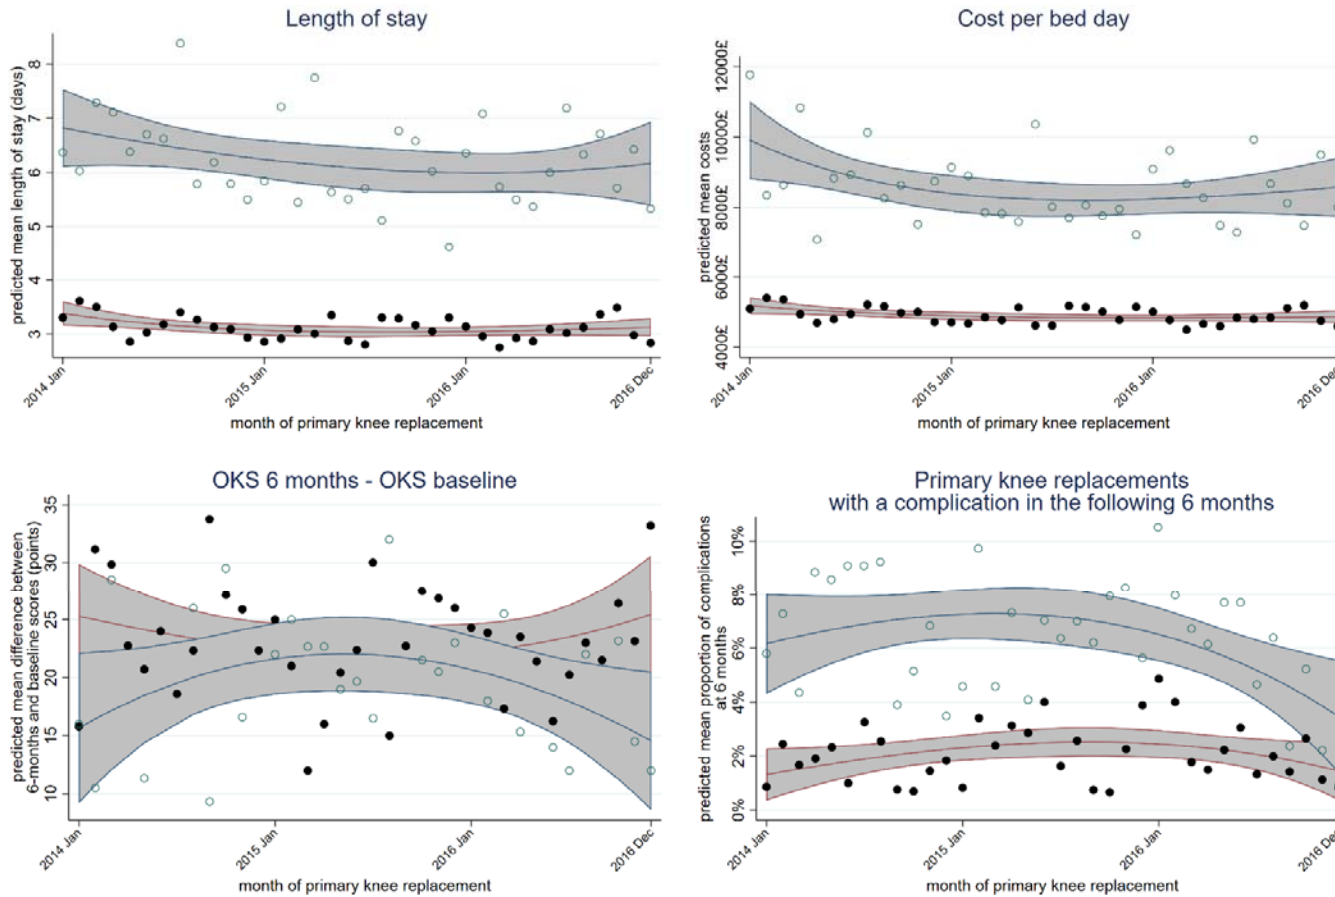

Total knee replacement, TKR; unicompartmental knee replacement, UKR; Oxford knee score, OKS; clinical commissioning groups, CCG
